# Supplementary material for: Visible light-enabled regioselective chlorination of coumarins using CuCl2via LMCT excitation
Source: Royal Society of Chemistry journal article supplement (doi:10.1039/d2ob01134d), 2022-01-01
Supplement: d2ob01134d1.pdf [file d2ob01134d1.pdf]

## Supplementary Materials

### **Visible light enabling regioselective chlorination of electron-deficient coumarins using $\text{CuCl}_2$ *via* LMCT excitation**

Weiming Li, Jinshan Liu, Min Zhou, Lin Ma, Min Zhang \*

School of Chemistry and Chemical Engineering, Guangxi University, Nanning,  
Guangxi 530004, China

Email: [cheminzhang@gxu.edu.cn](mailto:cheminzhang@gxu.edu.cn); [zhangminnju@hotmail.com](mailto:zhangminnju@hotmail.com).

## Contents

|                                                            |    |
|------------------------------------------------------------|----|
| 1. General information .....                               | 3  |
| 2. Typical procedure for 2a .....                          | 3  |
| 3. Syntheses of starting materials.....                    | 5  |
| 4. Conditions optimization and reaction scope details..... | 10 |
| 5. The spectral data .....                                 | 16 |
| 6. The NMR Charts.....                                     | 19 |
| 7. References.....                                         | 33 |

## 1. General information

All the commercially available coumarins are used without further purification. Thin-layer chromatography (TLC) was performed with silica gel GF254 plates. Column chromatography was performed on silica gel (300 ~ 400 mesh) with petroleum ether/ethyl acetate for the gradient elution. All melting points were measured without correction. Nuclear magnetic resonance (NMR) spectra were recorded on a Bruker Advance III HD 600/500 spectrometer at 600/500 MHz ( $^1\text{H}$  NMR) and 151/125 MHz ( $^{13}\text{C}$  NMR) respectively. The chemical shifts are reported relative to  $\text{CHCl}_3$  ( $\delta = 7.26$  for  $^1\text{H}$  NMR and  $\delta = 77.16$  for  $^{13}\text{C}$  NMR). The infrared spectra were recorded on a Nicolet iS 50 FT-IR spectrometer. HRMS spectra were acquired using an Agilent 6210 ESI/TOF mass spectrometer.

## 2. Typical procedure for 2a

A mixture of menadione (34.4 mg, 0.2 mmol),  $\text{CuCl}_2 \cdot 2\text{H}_2\text{O}$  (51.2 mg, 0.3 mmol),  $\text{LiCl}$  (25.4 mg, 0.6 mmol) and TFA (91.2 mg, 0.8 mmol) was dissolved in MeCN (2.0 mL) and put in a reaction vessel open to air as shown below and irradiated with two blue LEDs (460-465 nm, 20 W,  $\sim 1240 \text{ W/m}^2$ ) at 35 °C. The reaction vessel was open to air and the reaction process was monitored by TLC until completed. The reaction mixture was then diluted with 10 mL de-ionized water and extracted by 20 mL EtOAc for three times. The organic phase was combined, dried over  $\text{Na}_2\text{SO}_4$  and the solvent was removed under vacuum. The crude product was then put on silica gel chromatography and eluted with EA/PE (0.5:100) to give **2a** as a yellow solid (34.1 mg, 82.6%).

The reaction temperature is controlled by a low temperature circulator and the apparatus is shown below:

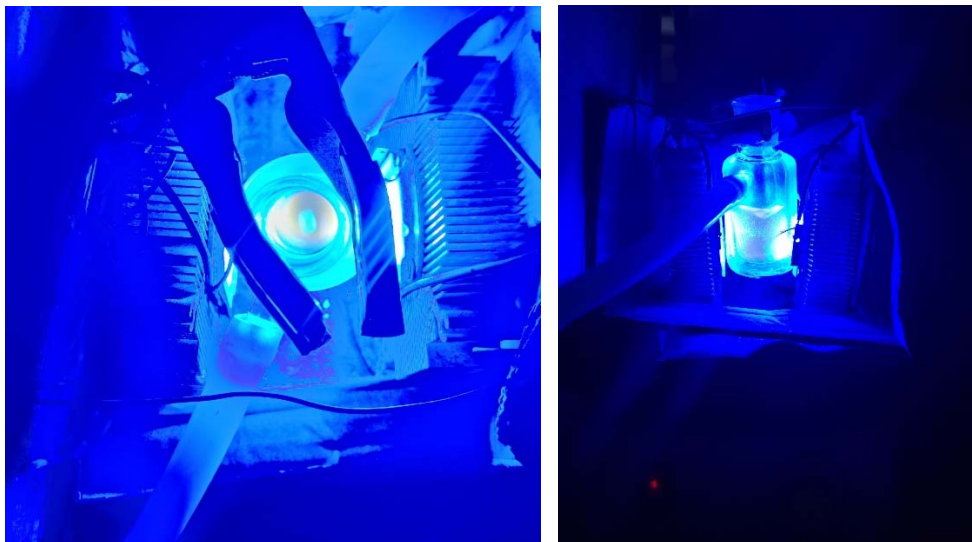

Experimental Apparatus

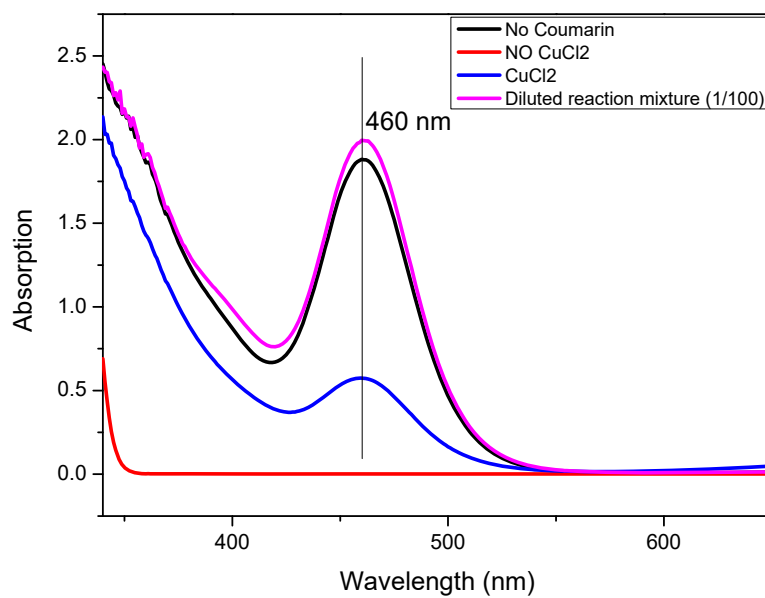

Figure S1 UV-vis spectra of  $\text{CuCl}_2$  and other mixtures.

### 3. Syntheses of starting materials

3.1. Syntheses of 6-phenyl-2H-chromen-2-one, 3H-benzo[f]chromen-3-one and 2H-benzo[h]chromen-2-one.<sup>1</sup>

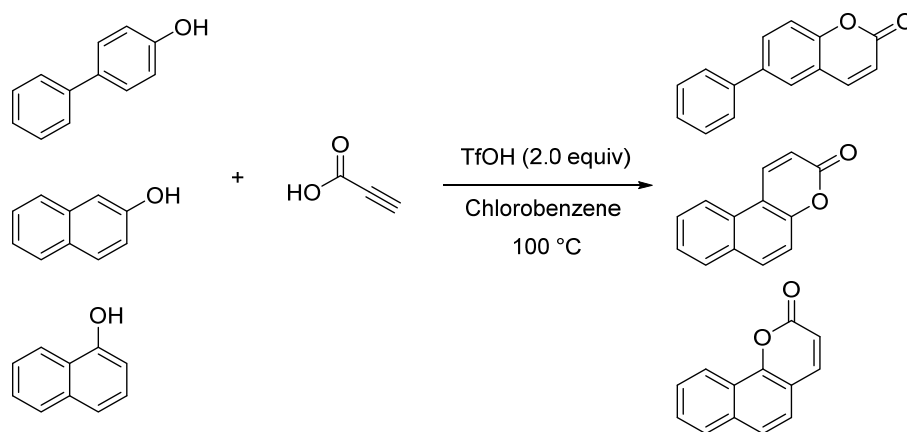

A mixture of Phenol derivatives (1.0 mmol), trifluoromethanesulfonic acid (1.0 mmol) and propionic acid (0.5 mmol) in chlorobenzene (3.0 mL) was stirred at 100 °C for 1 h. After completion of reaction as indicated by TLC, the reaction mixture was poured into H<sub>2</sub>O, neutralized with NaHCO<sub>3</sub> solution and extracted CH<sub>2</sub>Cl<sub>2</sub>. The organic layer was washed with 2 M NaOH, dried over anhydrous MgSO<sub>4</sub>. The solvent was removed in *vacuum*, and the products were purified by silica gel column chromatography (EtOAc-Hex) to give the desired product.

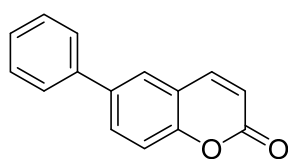

#### 6-phenyl-2H-chromen-2-one (30)

60 mg, 54%. Pale green solid, m.p. 108-110 °C (Acetone/PE, 1/2, V/V) (lit<sup>1</sup>. 118–120 °C). <sup>1</sup>H NMR (500 MHz, Chloroform-*d*) δ 7.78 – 7.71 (m, 2H), 7.66 (d, *J* = 2.1 Hz, 1H), 7.60 – 7.55 (m, 2H), 7.49 – 7.43 (m, 2H), 7.42 – 7.36 (m, 2H), 6.46 (dd, *J* = 9.5, 2.1 Hz, 1H). <sup>13</sup>C NMR (126 MHz, CDCl<sub>3</sub>) δ 160.8, 153.5, 143.6, 139.4, 137.9, 130.8, 129.1, 127.9, 127.1, 126.1, 119.1, 117.3, 117.1.

NMR spectra agree well with literature report.<sup>1</sup>

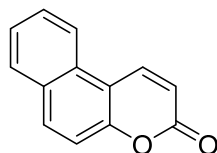

### 3H-benzo[f]chromen-3-one (3r)

78 mg, 80%. Light pink solid, m.p. 100-102 °C(lit<sup>1</sup>. 109–112 °C) (Acetone/PE, 1/1, V/V). <sup>1</sup>H NMR (500 MHz, CDCl<sub>3</sub>) δ 8.48 (d, *J* = 9.8 Hz, 1H), 8.22 (d, *J* = 8.4 Hz, 1H), 7.98 (d, *J* = 9.0 Hz, 1H), 7.91 (d, *J* = 8.1 Hz, 1H), 7.69 (ddd, *J* = 8.3, 7.0, 1.3 Hz, 1H), 7.57 (ddd, *J* = 8.0, 7.0, 1.0 Hz, 1H), 7.46 (d, *J* = 9.0 Hz, 1H), 6.57 (d, *J* = 9.8 Hz, 1H). <sup>13</sup>C NMR (126 MHz, CDCl<sub>3</sub>) δ 161.0, 154.0, 139.2, 133.2, 130.4, 129.2, 128.4, 126.2, 121.5, 117.2, 115.8, 113.1.

NMR spectra agree well with literature report.<sup>1</sup>

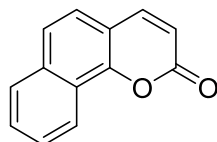

### 2H-benzo[h]chromen-2-one (3s)

80 mg, 81%. Light pink crystal, m.p. 136-138 °C (Acetone/PE, 1/2, V/V) (lit<sup>1</sup>. 100–102 °C). <sup>1</sup>H NMR (500 MHz, CDCl<sub>3</sub>) δ 8.58 – 8.44 (m, 1H), 7.90 – 7.84 (m, 1H), 7.83 (d, *J* = 9.5 Hz, 1H), 7.68 (d, *J* = 8.5 Hz, 1H), 7.65-7.59 (m, 2H), 7.46 (d, *J* = 8.5 Hz, 1H), 6.52 (d, *J* = 9.4 Hz, 1H). <sup>13</sup>C NMR (126 MHz, CDCl<sub>3</sub>) δ 161.1, 151.5, 144.3, 135.0, 128.9, 127.9, 127.4, 124.6, 123.7, 123.2, 122.5, 116.1, 114.4.

NMR spectra agree well with literature report.<sup>1</sup>

### 3.2 Synthesis of 7-chloro coumarin (3e).

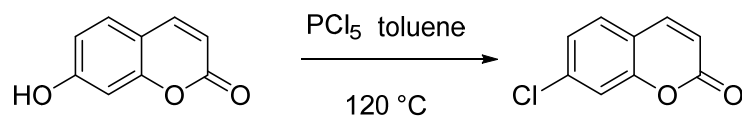

To a three-neck flask, 7-hydroxycoumarin (3.24g 20 mmol) and phosphorus pentachloride (16.63g 80 mmol) and 50 mL toluene were added. The mixture was heated to 110 °C for about 6.5 h until the reaction is completed by TLC monitoring. The reaction mixture was cooled and then poured into ice water with stirring. The aqueous phase was extracted with dichloromethane twice and the organic phase was combined and dried over Na<sub>2</sub>SO<sub>4</sub>, filtered and concentrated. The crude product was purified by silica gel chromatography and recrystallized in ethyl acetate to give 7-

chlorocoumarin (2.88 g, 80%).

### 3.3 Synthesis of 4-chloro coumarin(**3b**).

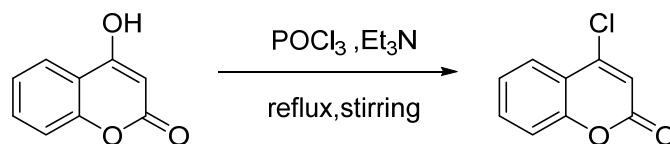

4-Chlorocoumarin was synthesized as literature procedure.<sup>2</sup> To an oven-dried two-neck round-bottom flask, 4-hydroxycoumarin (100 mmol, 16.2 g) was charged in phosphorus oxychloride (50 mL). To this mixture, triethylamine (150 mmol, 20 mL) was added slowly in a period of 5–10 min and the mixture was refluxed for 3 h. After the completion of reaction, it was cooled to rt and quenched slowly by pouring into ice-cold water and extracted with dichloromethane. The organic extract was washed with water, brine, dried over anhydrous MgSO<sub>4</sub>, and concentrated under reduced pressure. The crude was purified by silica gel column chromatography (CHCl<sub>3</sub>/EtOAc/PE = 7: 4: 100) to obtain 4-chlorocoumarin as white solid (14.5 g, 80% yield).

### 3.4 Synthesis of 6-fluoro coumarin and 6-bromo coumarin (**3h**, **3w**).

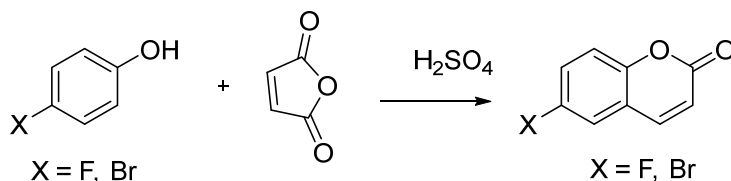

6-Fluoro coumarin was synthesized using literature procedure.<sup>3</sup> 4-Fluorophenol (0.01 mol), 0.01 mol of maleic anhydride and 1 mL of concentrated H<sub>2</sub>SO<sub>4</sub> were mixed together. And the mixture was heated to 150 °C for 1.5 h. After cooling to room temperature, the reaction solution was diluted with 50 mL of water and extracted four times with 20 mL of ethyl acetate. The extracted liquid was dried with anhydrous magnesium sulfate, and then filtered and concentrated. The obtained crude product was further eluted and recrystallized from ethyl acetate for several times to give 6-fluoro coumarin (0.52 g, 32%).

The 6-bromo coumarin was synthesized using the same protocol (0.17 g, 8%).

### 3.5 Synthesis of 4-bromocoumarin (**3v**)

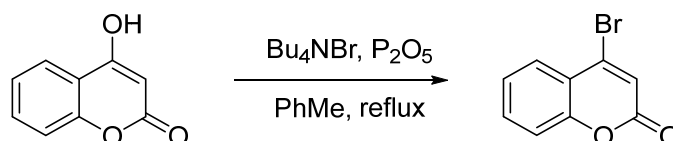

4-Bromo coumarin was synthesized using literature procedure.<sup>4</sup> 4-Hydroxycoumarin (1 g, 6.16 mmol) was added to toluene (12.4 mL, 0.5 M), under an Ar atmosphere and heated to 100 °C. Subsequently, Bu<sub>4</sub>NBr (2.98 g, 9.26 mmol) was added, heating was continued until the Bu<sub>4</sub>NBr was dissolved, then P<sub>2</sub>O<sub>5</sub> (1.75 g, 12.34 mmol) was added, and the mixture was further refluxed for 3 h. The hot organic layer was then poured out, and the lower layer was extracted with hot toluene (2 × 20 mL). The combined toluene layer was then successively washed with 5% NaHCO<sub>3</sub> (2 × 30 mL), water (50 mL), and saturated brine (50 mL). Subsequently, the organic layer was dried with anhydrous Na<sub>2</sub>SO<sub>4</sub> (10 g) and concentrated in vacuum to obtain 4-bromocoumarin (1.34 g, 96%, m.p. 87–89 °C).

### 3.6 Synthesis of 6,8-dichlorocoumarin(3g).

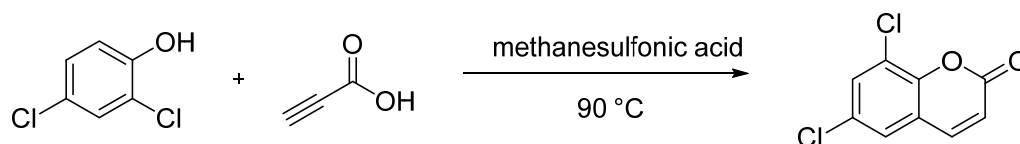

6,8-Dichlorocoumarin coumarin was synthesized as literature procedure.<sup>5</sup> To a solution of phenol derivative (10 mmol) in methanesulfonic acid (20 mL) was added propiolic acid (12 mmol) at room temperature. After stirring at 80-90 °C under N<sub>2</sub> atmosphere for 4 h, the solution was diluted with 50 mL de-ionized water and extracted with ethyl acetate (20 mL\*3). The ethyl acetate layer was washed with saturated Na<sub>2</sub>CO<sub>3</sub> (10 mL\*3), saturated NaCl, dried over MgSO<sub>4</sub> and concentrated to give 6,8-dichlorocoumarin (0.30 g, 14%) as a gray solid (m.p. 156-158 °C).

### 3.7 Synthesis of 8-chlorocoumarin (3f).

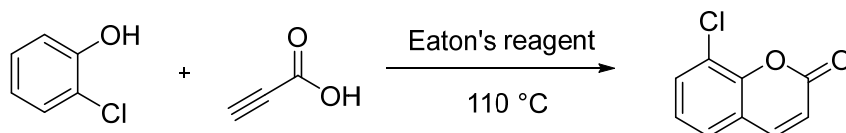

To a solution of *p*-chlorophenol (10 mmol) in Eaton's reagent (20 mL) was added propiolic acid (12 mmol) at room temperature. After stirring at 110 °C under N<sub>2</sub> atmosphere for 4 h, the solution was diluted with 50 mL de-ionized water and extracted with ethyl acetate (20 mL\*3). The ethyl acetate layer was washed with saturated Na<sub>2</sub>CO<sub>3</sub> (10 mL\*3), saturated NaCl, dried over MgSO<sub>4</sub>, concentrated and



chromatographed to give 8-chlorocoumarin (0.24 g, 13%) as a white solid with m.p. 140-142 °C.

### 3.8 Synthesis of 7-methoxycoumarin (**3n**).

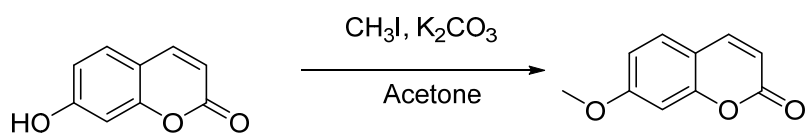

7-Methoxycoumarin was synthesized using literature procedure.<sup>6</sup> K<sub>2</sub>CO<sub>3</sub> (2.0 g, 14.5 mmol) and MeI (3.42 g, 24.1 mmol) were added to a solution of 7-hydroxyl coumarin (2.0 g, 12.3 mmol) in acetone (100 mL) and the mixture was reacted for 5 h. After filtration and dilution with EtOAc, the resulting solution was washed with brine and dried over anhydrous Na<sub>2</sub>SO<sub>4</sub>. The solvent was removed to afford compound 7-methoxycoumarin (2.1 g, 97%) as a crystalline solid.

## 4. Conditions optimization and reaction scope details

**Table S1** Reaction conditions screening for chlorination of menadione (**1a**).

| Entry          | PC/Other             | Lewis Acid                                    | Cl Source       | Acid           | Tim e, h   | Temp, °C  | Conver sion, % | Product yield, % <sup>a</sup> |             |             | and |
|----------------|----------------------|-----------------------------------------------|-----------------|----------------|------------|-----------|----------------|-------------------------------|-------------|-------------|-----|
|                |                      |                                               |                 |                |            |           |                | <b>2a</b>                     | <b>2a'</b>  | <b>2a''</b> |     |
| 1 <sup>c</sup> | 2% 4CzIPN            | /                                             | /               | HCl 3eq        | 3.0        | 35        | 100            | 8.9                           |             |             |     |
| 2 <sup>d</sup> | 2% 4CzIPN            | CuCl <sub>2</sub> ·2H <sub>2</sub> O 0.1 eq   | LiCl 2.8eq      | HCl 3eq        | 8.5        | 35        | 92.7           | 17.8                          |             |             |     |
| 3              | 2% 4CzIPN            | CuCl <sub>2</sub> ·2H <sub>2</sub> O 1.5eq    | /               | HCl 3eq        | 5.0        | 35        | 100            | 75.6                          | 12.2        | 4.2         |     |
| 4              | N/A                  | <b>CuCl<sub>2</sub>·2H<sub>2</sub>O 1.5eq</b> | /               | <b>HCl 3eq</b> | <b>4.3</b> | <b>35</b> | <b>100</b>     | <b>81.0</b>                   | <b>13.3</b> | <b>5.1</b>  |     |
| 5              | N/A                  | <b>CuCl<sub>2</sub>·2H<sub>2</sub>O 1.5eq</b> | <b>LiCl 3eq</b> | <b>TFA 4eq</b> | <b>4.2</b> | <b>35</b> | <b>100</b>     | <b>82.6</b>                   | <b>10.0</b> | <b>5.5</b>  |     |
| 6 <sup>e</sup> | N/A                  | CuCl <sub>2</sub> ·2H <sub>2</sub> O 1.5eq    | LiCl 3eq        | HOAc           | 5.5        | 35        | 91.4           | 11.8                          | /           | /           |     |
| 7 <sup>f</sup> | Under O <sub>2</sub> | CuCl <sub>2</sub> ·2H <sub>2</sub> O 1.5eq    | /               | HCl 3eq        | 4          | 35        | 100            | 85.5                          | 7.1         | 5.3         |     |
| 8 <sup>g</sup> | Under Ar             | CuCl <sub>2</sub> ·2H <sub>2</sub> O 1.5eq    | /               | HCl 3eq        | 8          | 35        | 84.1           | 42                            | 3.1         | 5.1         |     |
| 9 <sup>h</sup> | No light             | CuCl <sub>2</sub> ·2H <sub>2</sub> O 1.5eq    | /               | HCl 3eq        | 23         | 35        | NR             |                               |             |             |     |
| 10             | N/A                  | FeCl <sub>3</sub> ·6H <sub>2</sub> O 1.0 eq   | LiCl 3eq        | TFA 4eq        | 3          | 35        | 92.0           | 15.8                          | 3.1         | /           |     |
| 11             | N/A                  | CeCl <sub>3</sub> 1.0 eq                      | LiCl 3eq        | TFA 4eq        | 7.5        | 35        | 93.6           | 5.4                           |             |             |     |
| 12             | N/A                  | ZnCl <sub>2</sub> 1.0 eq                      | LiCl 4eq        | TFA 4eq        | 2.5        | 35        | 100            | 7.8                           |             |             |     |
| 13             | N/A                  | CuCl <sub>2</sub> ·2H <sub>2</sub> O 1.0eq    | NCS 2eq         | /              | 8.5        | 35        | 100            | 61.5                          | 2.7         | 5.7         |     |
| 14             | N/A                  | CuCl <sub>2</sub> ·2H <sub>2</sub> O 1.5 eq   | /               | HCl 4eq        | 4.2        | 35        | 100            | 80.7                          | 12.2        | 7.0         |     |
| 15             | N/A                  | CuCl <sub>2</sub> ·2H <sub>2</sub> O 1.5eq    | /               | HCl 3eq        | 6.2        | 24        | 100            | 77.5                          | 15.4        | 6.1         |     |
| 16             | N/A                  | CuCl <sub>2</sub> ·2H <sub>2</sub> O 1.5eq    | /               | HCl 3eq        | 5.0        | 30        | 100            | 82.1                          | 8.6         | 5.9         |     |
| 17             | N/A                  | CuCl <sub>2</sub> ·2H <sub>2</sub> O 1.5eq    | /               | HCl 3eq        | 4.3        | 40        | 100            | 80.0                          | 12.5        | 7.3         |     |
| 18             | N/A                  | CuCl <sub>2</sub> ·2H <sub>2</sub> O 0.5eq    | LiCl 5eq        | TFA 4eq        | 10         | 35        | 82.3           | 39.0                          | /           | 7.6         |     |
| 19             | N/A                  | CuCl <sub>2</sub> ·2H <sub>2</sub> O 1.0eq    | LiCl 4eq        | TFA 4eq        | 6.5        | 32        | 100            | 67.6                          | 10.0        | 6.0         |     |
| 20             | N/A                  | CuCl <sub>2</sub> ·2H <sub>2</sub> O 2.0eq    | LiCl 2eq        | TFA 4eq        | 3.8        | 35        | 100            | 80.7                          | 9.7         | 3.2         |     |
| 21             | N/A                  | CuCl <sub>2</sub> ·2H <sub>2</sub> O 1.5eq    | LiCl 2eq        | TFA 4eq        | 5.4        | 40        | 100            | 82.8                          | 10.9        | 5.0         |     |
| 22             | N/A                  | CuCl <sub>2</sub> ·2H <sub>2</sub> O 1.5eq    | LiCl 3eq        | TFA 2 eq       | 5.4        | 38        | 100            | 75.8                          | 11.2        | 6.2         |     |
| 23             | N/A                  | CuCl <sub>2</sub> ·2H <sub>2</sub> O 1.5eq    | /               | TFA 4eq        | 6          | 40        | 88.1           | 57.8                          | /           | /           |     |
| 24             | N/A                  | CuCl <sub>2</sub> ·2H <sub>2</sub> O 1.5eq    | LiCl 1eq        | TFA 4eq        | 6          | 40        | 94.8           | 80.3                          | 3.3         | 4.7         |     |
| 25             | N/A                  | CuCl <sub>2</sub> ·2H <sub>2</sub> O 1.0eq    | /               | HCl 4eq        | 5.1        | 35        | 100            | 71.6                          | 19.7        | 8.4         |     |

<sup>a</sup> Reagents and conditions: menadione (0.2 mmol), LiCl/TFA or HCl was mixed in 2 mL MeCN, irradiated between two blue LEDs (460-465 nm, 20 W, ~1240 W/m<sup>2</sup>) open to air at 35 °C. NR= No reaction. <sup>b</sup> Isolated yield. <sup>c</sup> Methyl chlorinated naphthoquinone (2-(chloromethyl)naphthalene-1,4-dione, MCNQ) was obtained in 21% yield. <sup>d</sup> MCNQ (3.4%) was obtained. <sup>e</sup> Reacted in 2 mL acetic acid. The major product is 3-methyl-1,4-dioxo-1,4-dihydronaphthalen-2-yl acetate (42%). <sup>f</sup> Using O<sub>2</sub> balloon. <sup>g</sup> Using Ar balloon (1 atm). MCNQ was obtained in 12% yield. <sup>h</sup> In dark.

**Table S2** Chlorination of naphthoquinone **1b**.<sup>a</sup>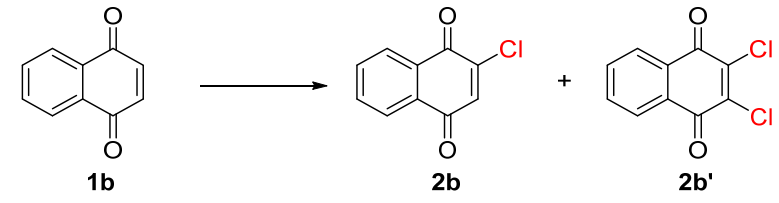

The reaction scheme shows naphthoquinone **1b** (1,4-naphthoquinone) reacting to form two products: 2-chloro-1,4-naphthoquinone (**2b**) and 1,2-dichloro-1,4-naphthoquinone (**2b'**). The chlorine atoms in the products are highlighted in red.

| Lewis Acid/eq.                              | LiCl     | TFA                  | Time, h    | Conversion, % | Yield, % <sup>b</sup> |             |
|---------------------------------------------|----------|----------------------|------------|---------------|-----------------------|-------------|
|                                             |          |                      |            |               | <b>2b</b>             | <b>2b'</b>  |
| CuCl <sub>2</sub> ·2H <sub>2</sub> O 2.5    | 1        | 2                    | 9          | 100           | 37.6                  | 40.0        |
| CuCl <sub>2</sub> ·2H <sub>2</sub> O 1.5    | 0        | 0 <sup>c</sup>       | 11.5       | 100           | 33.9                  | 39.6        |
| <b>CuCl<sub>2</sub>·2H<sub>2</sub>O 2.5</b> | <b>1</b> | <b>2<sup>d</sup></b> | <b>9.5</b> | <b>71.5</b>   | <b>60.5</b>           | <b>10.2</b> |
| CuCl <sub>2</sub> ·2H <sub>2</sub> O 1.5    | 3        | 4                    | 62.5       | 89.8          | 7.4                   | 44.1        |

<sup>a</sup> Reagents and conditions: naphthoquinone (0.2 mmol), LiCl/TFA or HCl was mixed in 2 mL MeCN, irradiated between two blue LEDs (460-465 nm, 20 W, ~1240 W/m<sup>2</sup>) open to air at 35 °C. <sup>b</sup> Isolated yield.

<sup>c</sup> 6 eq HCl. <sup>d</sup> 2.0 eq HOAc.

**Table S3** Screening of halogenation for coumarin (**3a**).<sup>a</sup>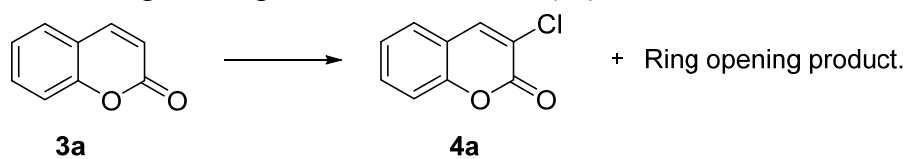

| Entry | PC/2 mol% | Lewis Acid                                                 | LiCl     | HCl      | TFA      | Time, h    | Conv., %   | Yield, % <sup>b</sup> |
|-------|-----------|------------------------------------------------------------|----------|----------|----------|------------|------------|-----------------------|
| 1     | N/A       | <b>CuCl<sub>2</sub>·2H<sub>2</sub>O 1.5 eq</b>             | <b>3</b> | <b>0</b> | <b>3</b> | <b>9.5</b> | <b>100</b> | <b>67.6</b>           |
| 2     | N/A       | CuCl <sub>2</sub> ·2H <sub>2</sub> O 1.5 eq                | 0        | 3        | 0        | 4.5        | 100        | 53.2                  |
| 3     | N/A       | CuCl <sub>2</sub> ·2H <sub>2</sub> O 1.5 eq                | 1        | 2.5      | 0        | 6.5        | 91.8       | 67.5                  |
| 4     | N/A       | CuCl <sub>2</sub> ·2H <sub>2</sub> O 2.0 eq                | 2        | 0        | 2        | 11.5       | 100        | 68.0                  |
| 5     | 4CzIPN    | CuCl <sub>2</sub> ·2H <sub>2</sub> O 0.1 eq                | 4.3      | 1.5      | 0        | 3.2        | 100        | 56.6                  |
| 6     | 4CzIPN    | CuCl <sub>2</sub> ·2H <sub>2</sub> O 0.1 eq                | 2        | 0        | 1.5      | 1.8        | 100        | 53.1                  |
| 7     | 4CzIPN    | N/A                                                        | 2        | 0        | 1.5      | 1.8        | 64.0       | 0 <sup>c</sup>        |
| 8     | N/A       | Cu(AcO) <sub>2</sub> ·H <sub>2</sub> O 1.5 eq              | 5        | 0        | 3        | 15         | 100        | 65.0                  |
| 9     | N/A       | CuCl 1.5 eq                                                | 5        | 0        | 3        | 14         | 100        | 69.4                  |
| 10    | N/A       | Cu(BF <sub>4</sub> ) <sub>2</sub> ·H <sub>2</sub> O 1.5 eq | 6        | 0        | 3        | 10         | 100        | 66.5                  |

<sup>a</sup> Reagents and conditions: a mixture of coumarin (0.2 mmol), Lewis Acid, LiCl or HCl was dissolved in MeCN (2 mL) and irradiated under two blue LEDs (460-465 nm, 20 W, ~1240 W/m<sup>2</sup>) at 35 °C, open to air. NR= No reaction. <sup>b</sup> Isolated yield. <sup>c</sup> The conversion of coumarin is based on the recovery of starting materials (36.0%), complicated high polarized products was generated.

**Table S4** Scope of the chlorination reactions.

| Substrate | Substrate's Structure                                                               | Product                                                                             | Deviation from standard condition <sup>a</sup> | Time, h | Yield, % |
|-----------|-------------------------------------------------------------------------------------|-------------------------------------------------------------------------------------|------------------------------------------------|---------|----------|
| <b>3a</b> | 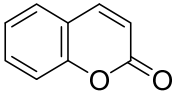   |    | None                                           | 9.5     | 68       |
| <b>3b</b> |    |    | None                                           | 12      | 87       |
| <b>3c</b> |    |    | None                                           | 7.5     | 66       |
| <b>3d</b> |    |    | None                                           | 8.5     | 70       |
| <b>3e</b> |   |   | None                                           | 6       | 62       |
| <b>3f</b> |  |  | None                                           | 10.5    | 62       |
| <b>3g</b> |  |  | None                                           | 9.5     | 75       |
| <b>3h</b> |  |  | None                                           | 16      | 61       |
| <b>3i</b> |  |  | None                                           | 10.5    | 62       |
| <b>3j</b> |  |  | None                                           | 37      | 69       |
| <b>3k</b> |  |  | 2.5 eq CuCl <sub>2</sub> ·2H <sub>2</sub> O    | 11.5    | 87       |

|           |                                                                                     |                                                                                     |                                                             |      |    |
|-----------|-------------------------------------------------------------------------------------|-------------------------------------------------------------------------------------|-------------------------------------------------------------|------|----|
| <b>3l</b> | 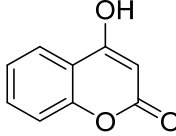   |    | None                                                        | 9.5  | 89 |
| <b>3m</b> |    |    | None                                                        | 3.5  | 57 |
| <b>3n</b> |    |    | None                                                        | 11.5 | 78 |
| <b>3o</b> |    |    | 2.5 eq CuCl <sub>2</sub> ·2H <sub>2</sub> O                 | 26   | 74 |
| <b>3p</b> |    |    | None                                                        | 6    | 18 |
| <b>3q</b> |  |  | 2.5 eq CuCl <sub>2</sub> ·2H <sub>2</sub> O,<br>1.5 eq HOAc | 1.5  | 29 |
| <b>3r</b> |  |  | 4 eq TFA                                                    | 13.5 | 74 |
| <b>3s</b> |  |  | 2.5 eq CuCl <sub>2</sub> ·2H <sub>2</sub> O                 | 36   | 58 |
| <b>5a</b> |  |  | None                                                        | 16   | 37 |
| <b>5b</b> |  |  | None                                                        | 10   | 25 |

|    |                                                                                   |                                                                                   |      |   |    |
|----|-----------------------------------------------------------------------------------|-----------------------------------------------------------------------------------|------|---|----|
| 3v | 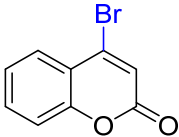 |  | None | 9 | 93 |
|    |                                                                                   | <b>3b</b>                                                                         |      |   |    |
| 3w |  |  | None | 8 | 67 |
|    |                                                                                   | <b>3d</b>                                                                         |      |   |    |

<sup>a</sup> Standard condition: Substrate (0.2 mmol), CuCl<sub>2</sub>·2H<sub>2</sub>O (0.3 mmol), LiCl (0.6 mmol), TFA (0.4 mmol) in 2 mL MeCN. The reaction mixture was irradiated under two blue LEDs (460-465 nm, 20 W, ~1240 W/m<sup>2</sup>) at 35 °C until the reaction is completed by TLC monitoring.

## 5. The spectral data

The unreported compounds were characterized by  $^1\text{H}$  NMR,  $^{13}\text{C}$  NMR, IR and HRMS the details are given below. All the known compounds' spectral data ( $^1\text{H}$  NMR,  $^{13}\text{C}$  NMR, IR, MS) agree with the reported references. The spectral data of the compounds reported in previous paper of *Synlett*, 2019, 30, 630–634 (DOI: 10.1055/s-0037-1612080) are not shown here.

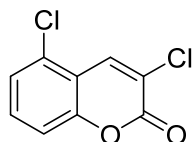

### 3,5-dichloro-2H-chromen-2-one (4c)

Yield: 28.3 mg, 66%. White solid, m.p. 164–166 °C (Acetone/PE, 2/1, V/V).  $^1\text{H}$  NMR (500 MHz,  $\text{CDCl}_3$ )  $\delta$  8.25 (s, 1H), 7.48 (t,  $J = 8.2$  Hz, 1H), 7.37 (dd,  $J = 8.0, 0.8$  Hz, 1H), 7.28 (d,  $J = 8.4$  Hz, 1H).  $^{13}\text{C}$  NMR (126 MHz,  $\text{CDCl}_3$ )  $\delta$  156.6, 153.5, 136.6, 132.0, 131.7, 125.7, 123.8, 117.6, 115.7. IR(KBr)  $\nu_{\text{max}}$ : 3089, 1743, 1730, 1609, 1591, 1446, 1314, 1247, 1228, 1201, 1157, 1137, 991, 964, 914, 789, 752, 722, 679, 605, 582, 475. HRMS calcd for  $\text{C}_9\text{H}_5\text{Cl}_2\text{O}_2^+$  ( $\text{M}+\text{H}$ ) $^+$ ( $\text{Cl}^{35}$ ): 214.9661, found: 214.9662.

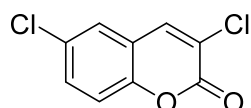

### 3,6-dichloro-2H-chromen-2-one (4d)

Yield: 29.5 mg, 70%. White solid, m.p. 166–168 °C (Acetone/PE, 2/1, V/V) (lit<sup>7</sup> 124–126 °C).  $^1\text{H}$  NMR (500 MHz,  $\text{CDCl}_3$ )  $\delta$  7.81 (s, 1H), 7.49 (dd,  $J = 8.8, 2.4$  Hz, 1H), 7.45 (d,  $J = 2.4$  Hz, 1H), 7.31 (d,  $J = 8.8$  Hz, 1H).  $^{13}\text{C}$  NMR (151 MHz,  $\text{CDCl}_3$ )  $\delta$  156.8, 151.2, 138.9, 132.0, 130.6, 126.6, 124.0, 119.9, 118.4. IR(KBr)  $\nu_{\text{max}}$ : 3099, 3062, 3045, 1732, 1601, 1557, 1475, 1409, 1336, 1266, 1241, 1145, 1081, 998, 945, 925, 893, 865, 819, 755, 651, 638, 571, 530, 461  $\text{cm}^{-1}$ . HRMS calcd for  $\text{C}_9\text{H}_5\text{Cl}_2\text{O}_2^+$  ( $\text{M}+\text{H}$ ) $^+$ ( $\text{Cl}^{35}$ ): 214.9661, found: 214.9668.

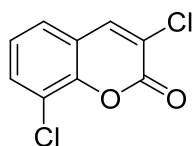

### 3,8-dichloro-2H-chromen-2-one (4f)

Yield: 26.5 mg, 62%. White solid, m.p. 164–166 °C (Acetone/PE, 2/1, V/V).  $^1\text{H}$  NMR (500 MHz,  $\text{CDCl}_3$ )  $\delta$  7.88 (s, 1H), 7.61 (d,  $J = 7.8$  Hz, 1H), 7.38 (d,  $J = 7.7$  Hz, 1H), 7.27 (t,  $J = 7.9$  Hz, 1H).  $^{13}\text{C}$  NMR (126 MHz,  $\text{CDCl}_3$ )  $\delta$  156.3, 148.5, 139.7, 132.4, 125.8, 125.5, 123.4, 122.0, 120.2. IR(KBr)  $\nu_{\text{max}}$ : 2924, 2855, 1756, 1738, 1600, 1489, 1442, 1354, 1253, 1225, 1143, 10036, 948, 932, 779, 748, 725, 658  $\text{cm}^{-1}$ . HRMS calcd for  $\text{C}_9\text{H}_5\text{Cl}_2\text{O}_2^+$  ( $\text{M}+\text{H}$ ) $^+$ ( $\text{Cl}^{35}$ ): 214.9661, found: 214.9657.



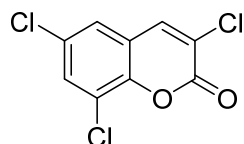

### 3,6,8-trichloro-2H-chromen-2-one (4g)

Yield: 37.2 mg, 75%. White solid, m.p. 126-128°C (Acetone/PE, 2/1, V/V). <sup>1</sup>H NMR (500 MHz, CDCl<sub>3</sub>) δ 7.79 (s, 1H), 7.60 (d, *J* = 2.2 Hz, 1H), 7.36 (d, *J* = 2.3 Hz, 1H). <sup>13</sup>C NMR (126 MHz, CDCl<sub>3</sub>) δ 155.7, 147.1, 138.6, 131.9, 130.4, 125.2, 124.7, 122.8, 120.6. IR(KBr) ν<sub>max</sub>: 3075, 2924, 2853, 1754, 1553, 1458, 1449, 1439, 1416, 1341, 1243, 1229, 1149, 1100, 1013, 966, 931, 885, 866, 837, 752, 688, 641, 573, 539 cm<sup>-1</sup>. HRMS calcd for C<sub>9</sub>H<sub>4</sub>Cl<sub>3</sub>O<sub>2</sub><sup>+</sup> (M+H)<sup>+</sup>(Cl<sup>35</sup>): 248.9271, found: 248.9267.

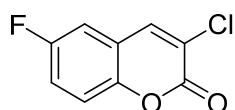

### 3-chloro-6-fluoro-2H-chromen-2-one (4h)

Yield: 24.2 mg, 61%. White solid, m.p. 148-150 °C (Acetone/PE, 2/1, V/V). <sup>1</sup>H NMR (500 MHz, CDCl<sub>3</sub>) δ 7.84 (s, 1H), 7.35 (dd, *J* = 9.1, 4.4 Hz, 1H), 7.28 (ddd, *J* = 10.9, 8.1, 2.9 Hz, 1H), 7.17 (dd, *J* = 7.7, 2.8 Hz, 1H). <sup>13</sup>C NMR (126 MHz, CDCl<sub>3</sub>) δ 159.16 (d, *J* = 245.6 Hz), 156.95 (s), 148.98 (d, *J* = 2.1 Hz), 139.17 (d, *J* = 2.8 Hz), 124.05 (s), 119.65 (d, *J* = 9.3 Hz), 119.46 (d, *J* = 24.6 Hz), 118.55 (d, *J* = 8.5 Hz), 112.73 (d, *J* = 24.5 Hz). <sup>19</sup>F NMR (471 MHz, CDCl<sub>3</sub>) δ -116.79. IR(KBr) ν<sub>max</sub>: 3054, 1741, 1568, 1486, 1431, 1346, 1260, 1149, 1001, 933, 890, 876, 822, 750, 696, 588, 463 cm<sup>-1</sup>. HRMS calcd for C<sub>9</sub>H<sub>5</sub>ClFO<sub>2</sub><sup>+</sup> (M+H)<sup>+</sup>(Cl<sup>35</sup>): 198.9957, found: 198.9954.

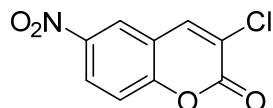

### 3-chloro-6-nitro-2H-chromen-2-one (4i)

Yield: 28.3 mg, 62%. Yellow solid, m.p. 186-188 °C (Acetone/PE, 2/1, V/V). <sup>1</sup>H NMR (600 MHz, CDCl<sub>3</sub>) δ 8.44 – 8.40 (m, 1H), 8.41 (s, 1H), 7.96 (s, 1H), 7.53 – 7.48 (m, 1H). <sup>13</sup>C NMR (151 MHz, CDCl<sub>3</sub>) δ 156.1, 155.8, 144.7, 138.7, 126.7, 125.2, 123.2, 119.0, 118.2. IR (KBr): 3056, 1741, 1609, 1528, 1475, 1350, 1261, 1244, 1155, 1121, 1086, 990, 949, 930, 841, 821, 756, 748, 722, 650 cm<sup>-1</sup>. HRMS calcd for C<sub>9</sub>H<sub>4</sub>ClNNaO<sub>4</sub><sup>+</sup> (M+Na)<sup>+</sup>(Cl<sup>35</sup>): 247.9721, found: 247.9726.

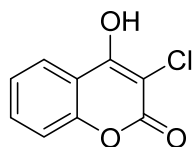

### 3-chloro-4-hydroxy-2H-chromen-2-one (4l)

Yield: 34.9 mg, 89%. White solid, m.p. 206-208 °C (lit<sup>8</sup> 206-207°C) (CH<sub>2</sub>Cl<sub>2</sub>/PE, 1/1, V/V). <sup>1</sup>H NMR (500 MHz, Acetone-*d*<sub>6</sub>) δ 7.94 (dd, *J* = 7.9, 1.5 Hz, 1H), 7.69 (ddd, *J* = 8.8, 7.4, 1.6 Hz, 1H), 7.42 (t, *J* = 7.6 Hz, 1H), 7.38 (d, *J* = 8.3 Hz, 1H). <sup>13</sup>C NMR (126 MHz, Acetone-*d*<sub>6</sub>) δ 160.4, 158.8, 152.6, 133.5, 125.3, 124.2, 117.3, 116.5, 100.4. NMR spectra agree well with literature report.<sup>8</sup>

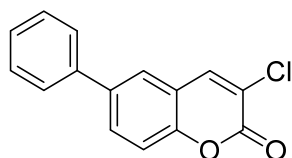

### 3-chloro-6-phenyl-2H-chromen-2-one (4o)

Yield: 38.5 mg, 74%. White solid, m.p. 162-164 °C (CH<sub>2</sub>Cl<sub>2</sub>/PE, 1/2, V/V). <sup>1</sup>H NMR (500 MHz, CDCl<sub>3</sub>) δ 7.93 (s, 1H), 7.76 (dd, *J* = 8.6, 2.2 Hz, 1H), 7.63 (d, *J* = 2.2 Hz, 1H), 7.57 (dt, *J* = 3.1, 1.9 Hz, 2H), 7.51 – 7.45 (m, 2H), 7.45 – 7.38 (m, 2H). <sup>13</sup>C NMR (126 MHz, CDCl<sub>3</sub>) δ 157.4, 152.2, 140.2, 139.2, 138.6, 131.0, 129.2, 128.2, 127.2, 125.5, 122.9, 119.2, 117.3. IR(KBr) ν<sub>max</sub>: 1730, 1708, 1569, 1480, 996, 754, 693, 645, 607 cm<sup>-1</sup>. HRMS calcd for C<sub>15</sub>H<sub>10</sub>ClO<sub>2</sub><sup>+</sup> (M+H)<sup>+</sup>(Cl<sup>35</sup>): 257.0364, found: 257.0360.

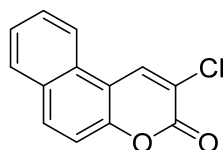

### 2-chloro-3H-benzo[f]chromen-3-one (4r)

Yield: 34.7 mg, 75%. White solid, m.p. 160-162 °C (lit<sup>9</sup> 164-165 °C) (CH<sub>2</sub>Cl<sub>2</sub>/PE, 1/2, V/V). <sup>1</sup>H NMR (500 MHz, CDCl<sub>3</sub>) δ 8.57 (s, 1H), 8.14 (d, *J* = 8.4 Hz, 1H), 7.98 (d, *J* = 9.0 Hz, 1H), 7.91 (d, *J* = 8.1 Hz, 1H), 7.72 – 7.67 (m, 1H), 7.60 (ddd, *J* = 8.1, 6.9, 1.1 Hz, 1H), 7.43 (d, *J* = 9.0 Hz, 1H). <sup>13</sup>C NMR (126 MHz, CDCl<sub>3</sub>) δ 157.5, 152.5, 136.4, 133.3, 130.5, 129.2, 128.7, 128.4, 126.6, 121.9, 121.5, 116.7, 113.2. IR(KBr) ν<sub>max</sub>: 3063, 2924, 1732, 1697, 1626, 1586, 1562, 1509, 1457, 1435, 1330, 1277, 1208, 1001, 985, 916, 903, 812, 776, 745, 588, 539 cm<sup>-1</sup>.

NMR spectra agree well with literature report.<sup>9</sup>

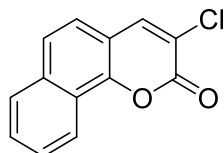

### 3-chloro-2H-benzo[h]chromen-2-one (4s)

Yield: 27.6 mg, 58%. White solid, m.p. 146-148 °C (CH<sub>2</sub>Cl<sub>2</sub>/PE, 1/2, V/V). <sup>1</sup>H NMR (500 MHz, CDCl<sub>3</sub>) δ 8.48 – 8.42 (m, 1H), 7.92 (s, 1H), 7.85 (dd, *J* = 5.9, 3.3 Hz, 1H), 7.68 (d, *J* = 8.5 Hz, 1H), 7.66 – 7.60 (m, 2H), 7.37 (d, *J* = 8.5 Hz, 1H). <sup>13</sup>C NMR (126 MHz, CDCl<sub>3</sub>) δ 157.5, 149.9, 140.8, 134.7, 129.0, 127.9, 127.6, 125.2, 122.8, 122.7, 122.2, 121.8, 114.3. IR(KBr) ν<sub>max</sub>: 1739, 1721, 1635, 1601, 1556, 1542, 1471, 1373, 1340, 1278, 1128, 1049, 941, 918, 807, 754, 671, 619, 569 cm<sup>-1</sup>. HRMS calcd for C<sub>13</sub>H<sub>8</sub>ClO<sub>2</sub><sup>+</sup> (M+H)<sup>+</sup>(Cl<sup>35</sup>): 231.0207, found: 231.0204.

## 6. The NMR Charts

3o

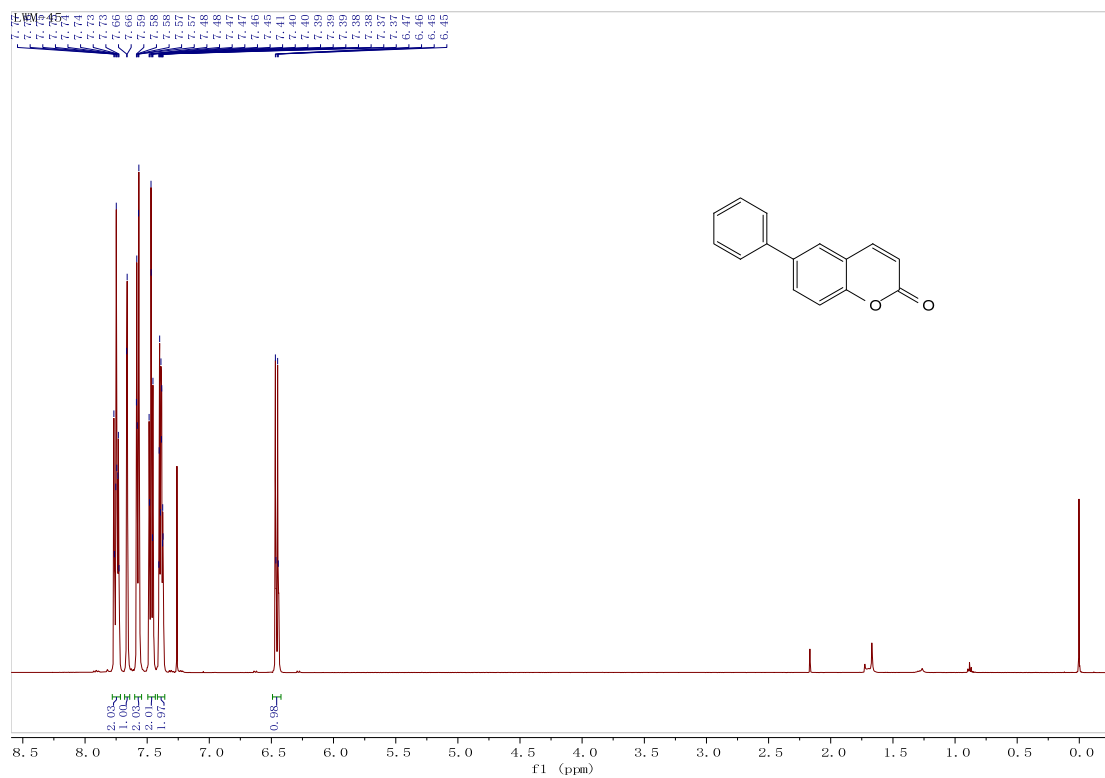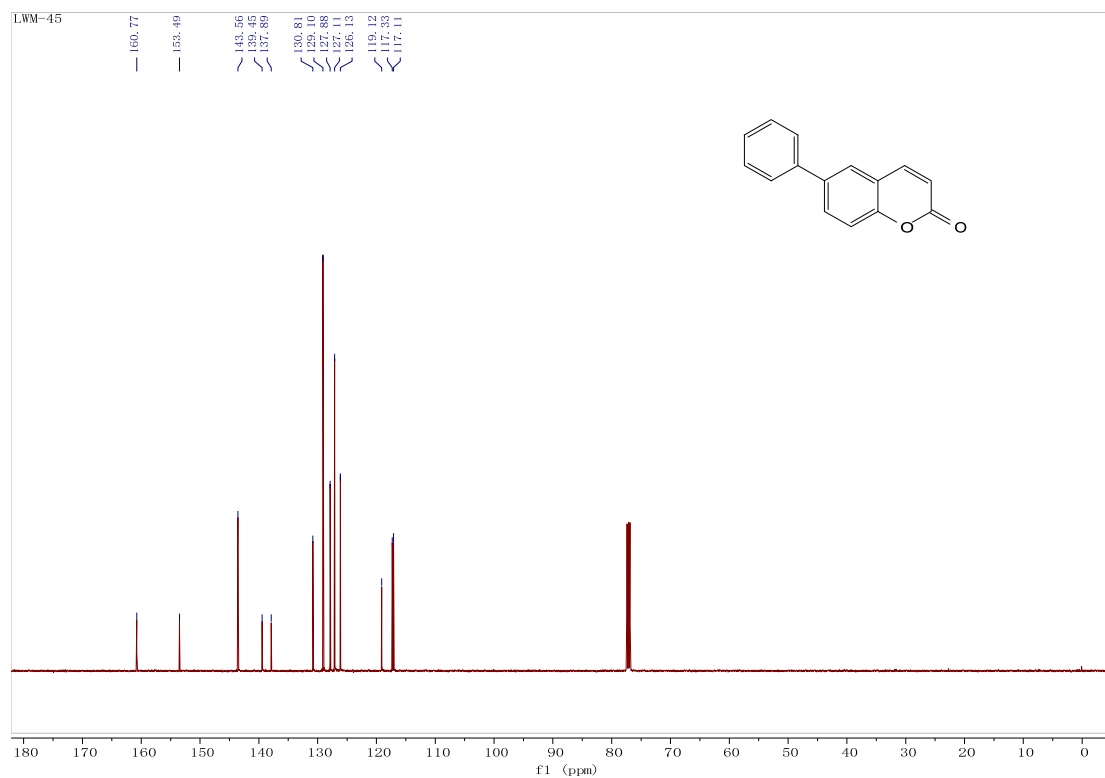

3r

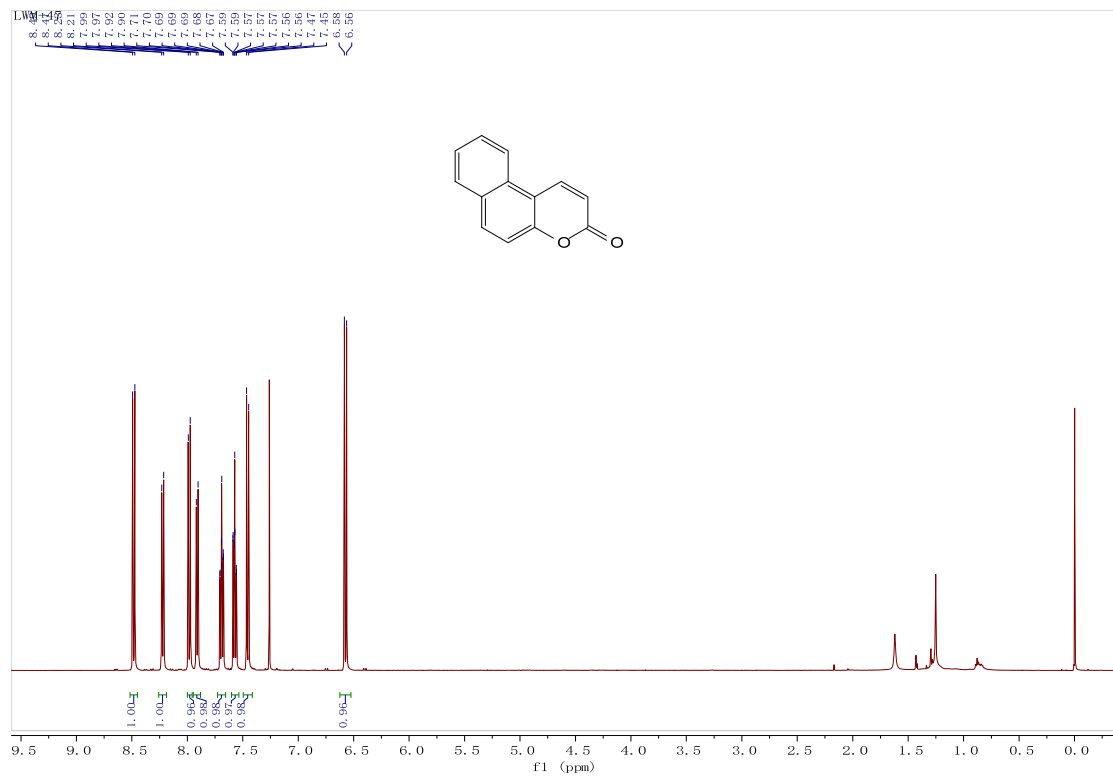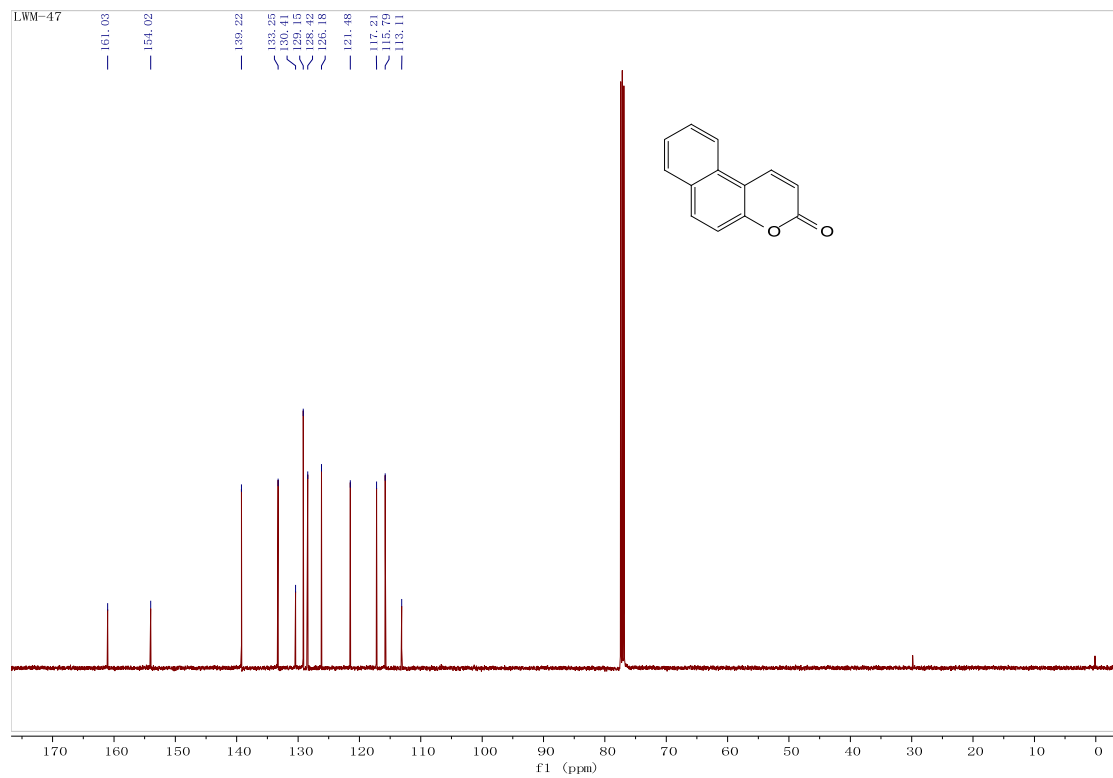

3s

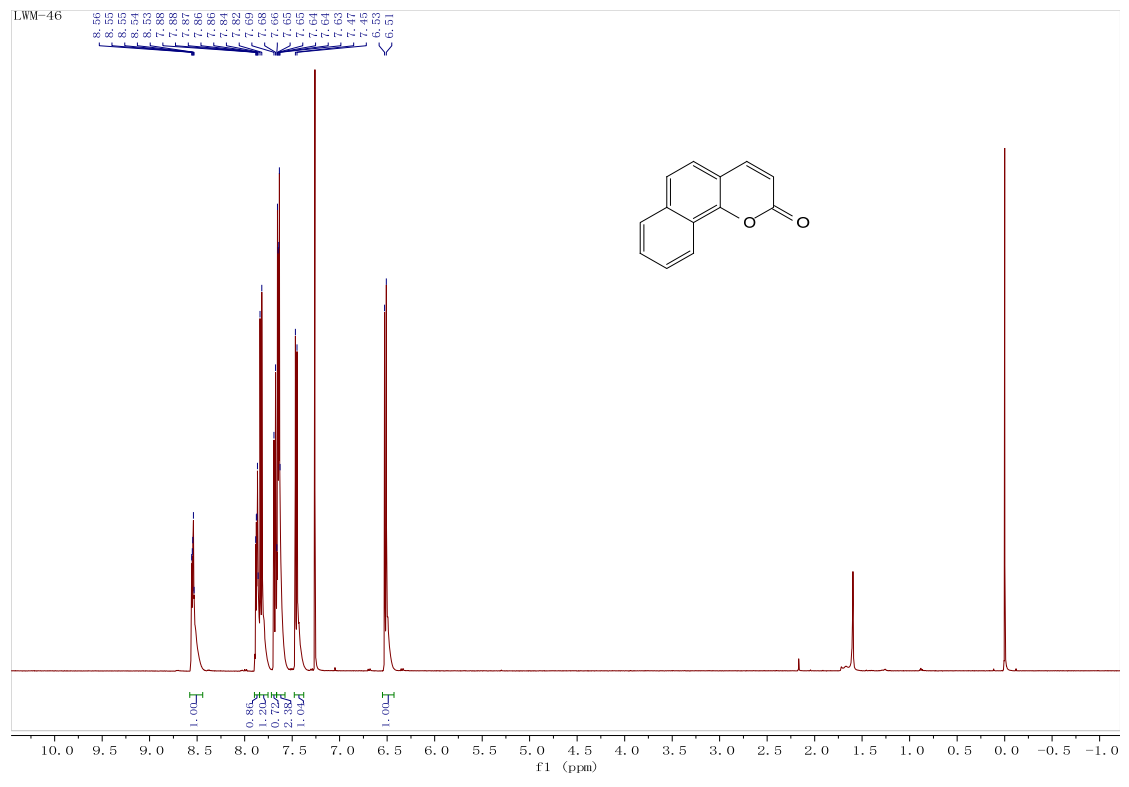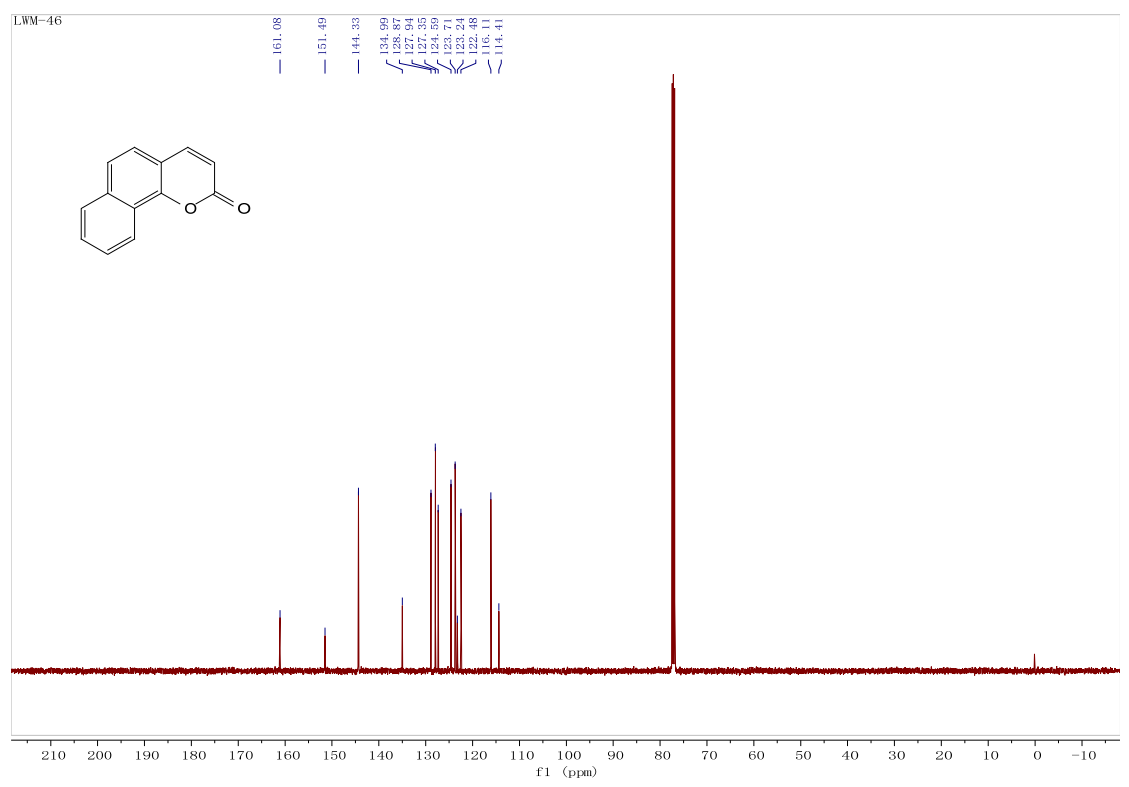

4c

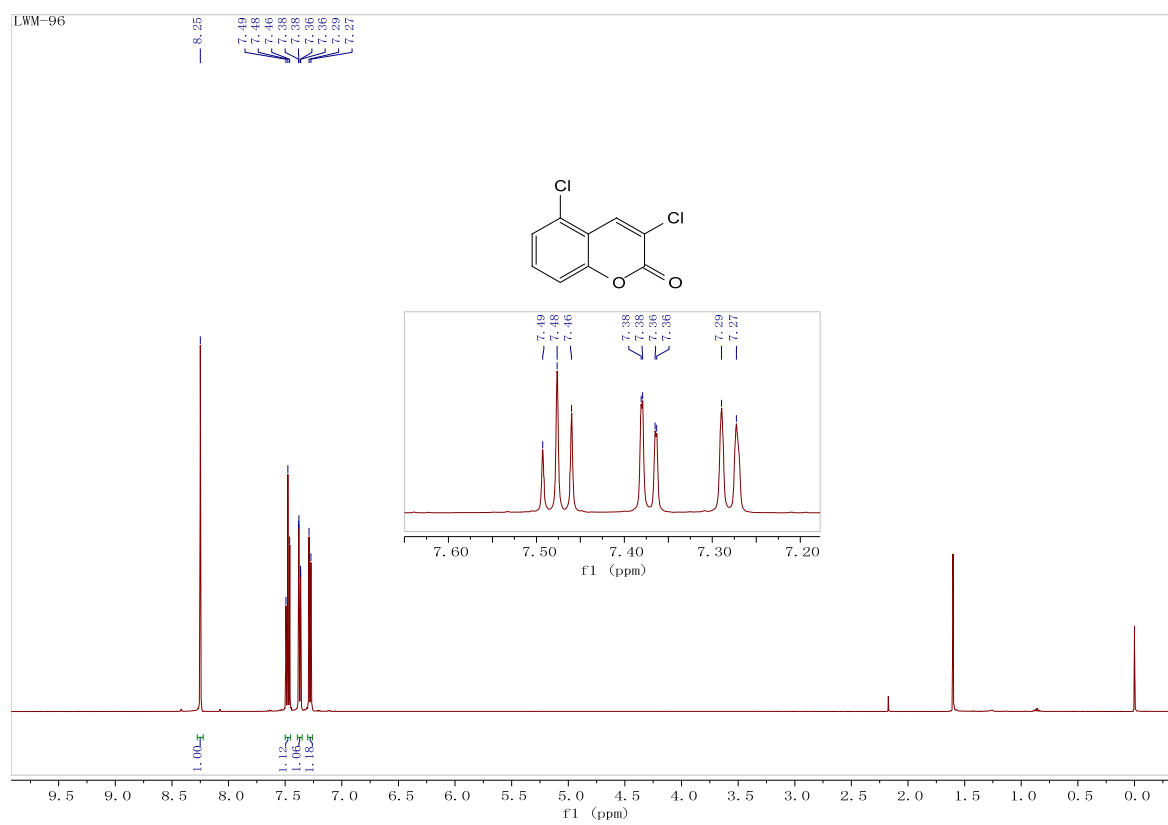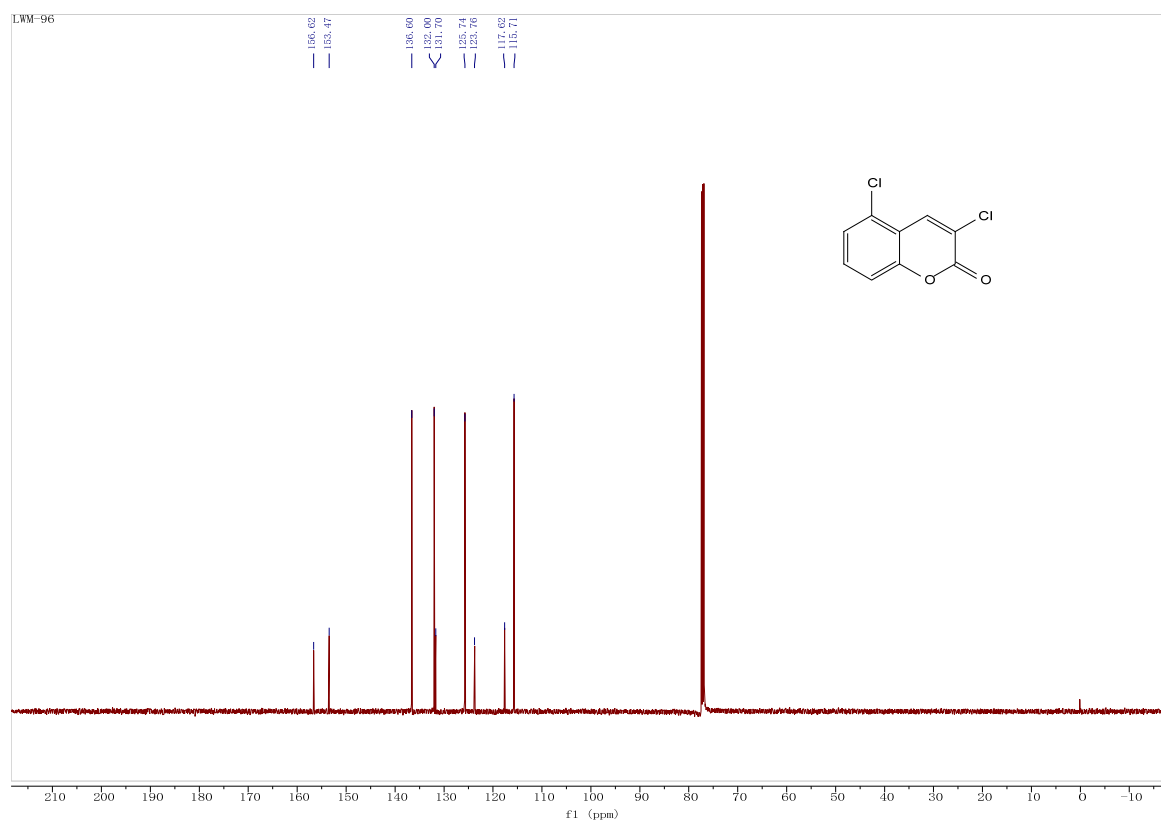

4d

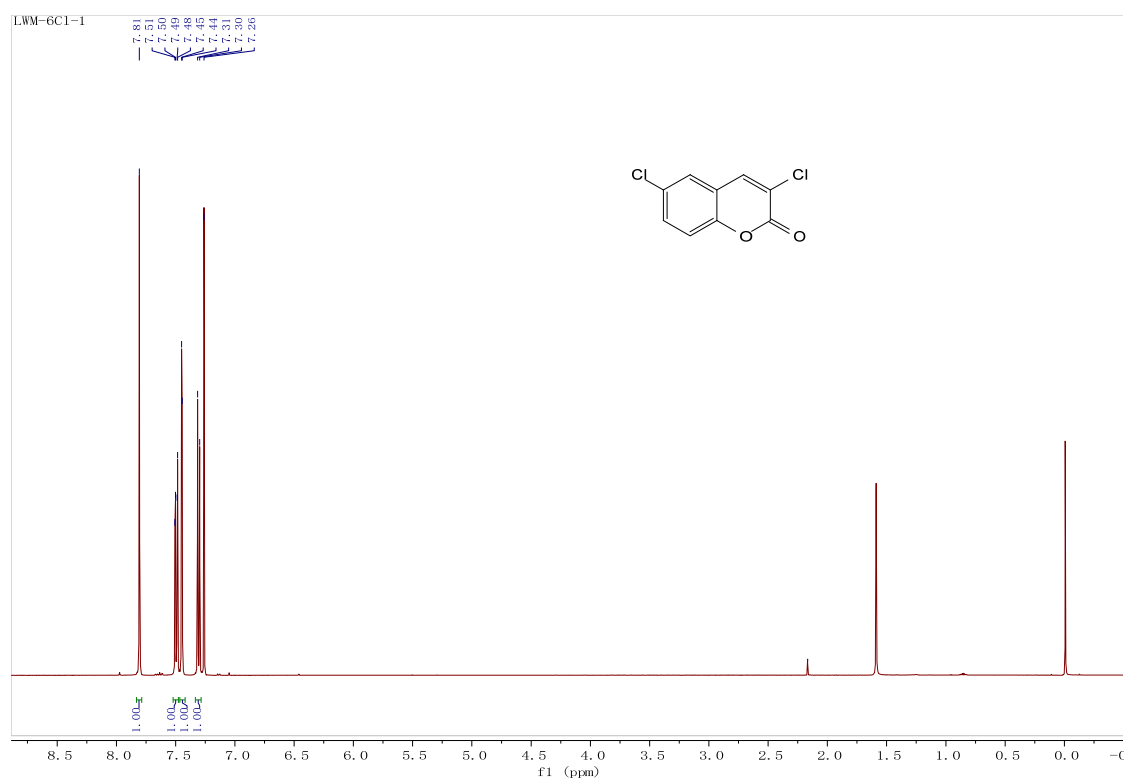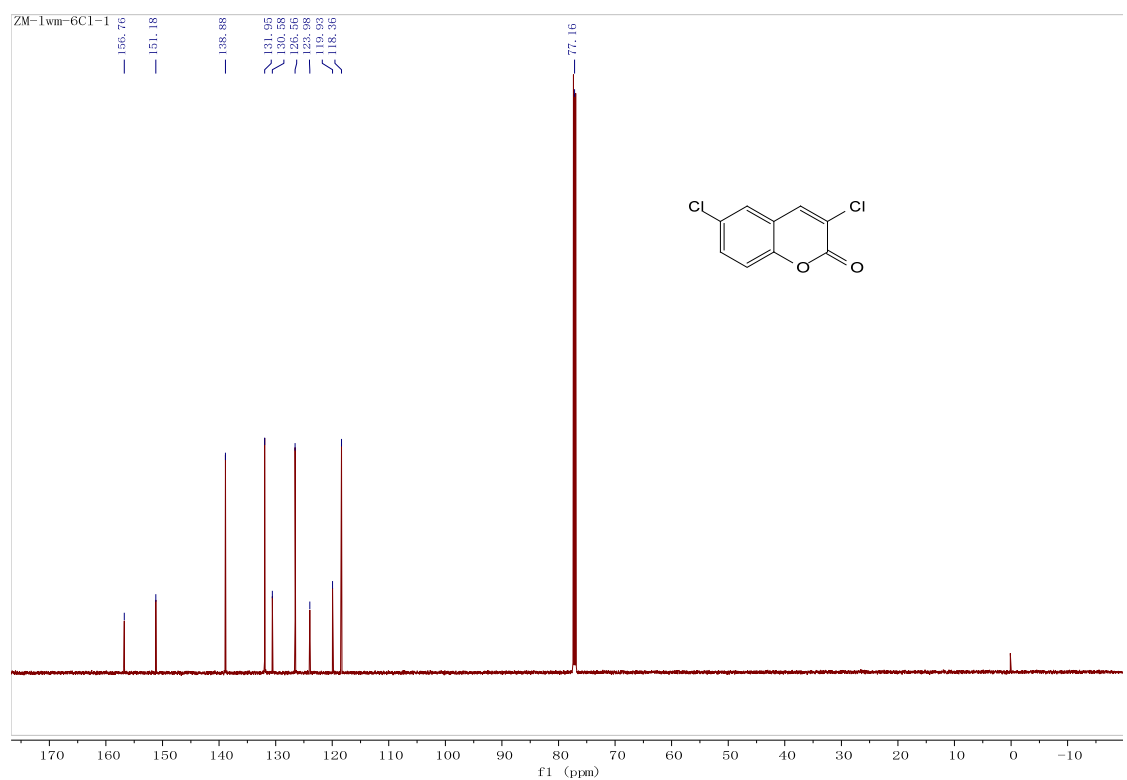

4f

LWM-94

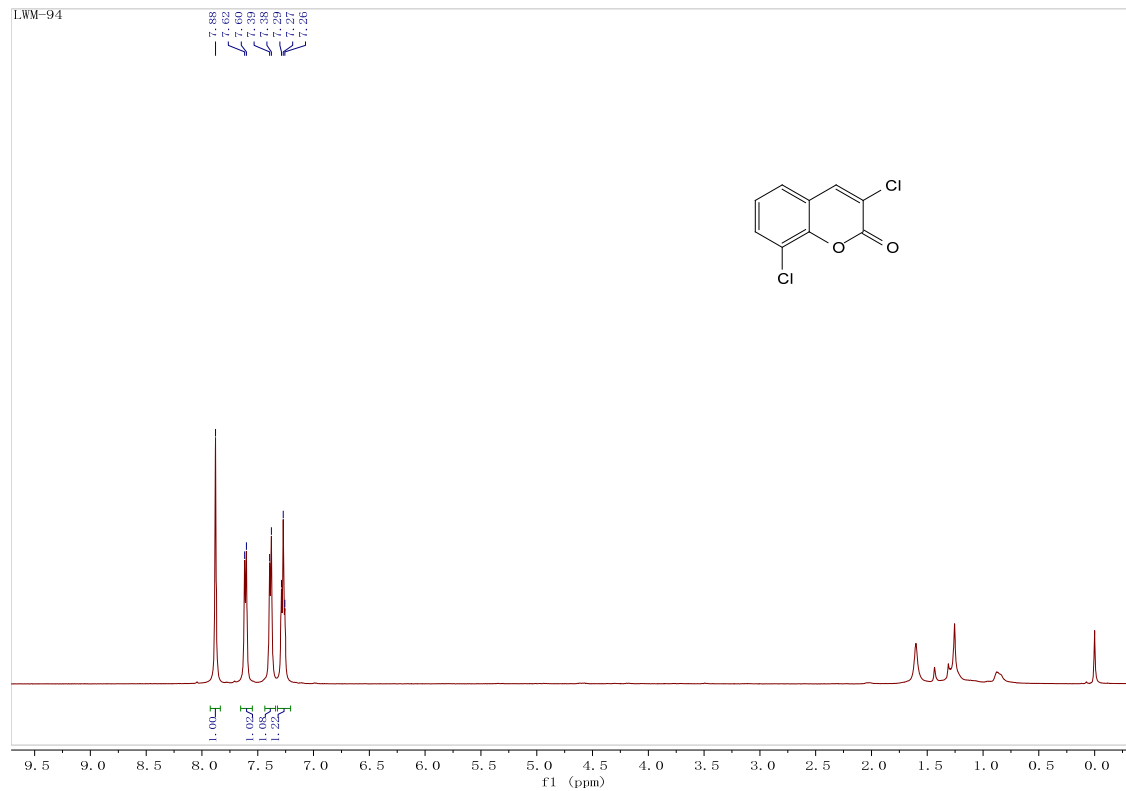

LWM-87

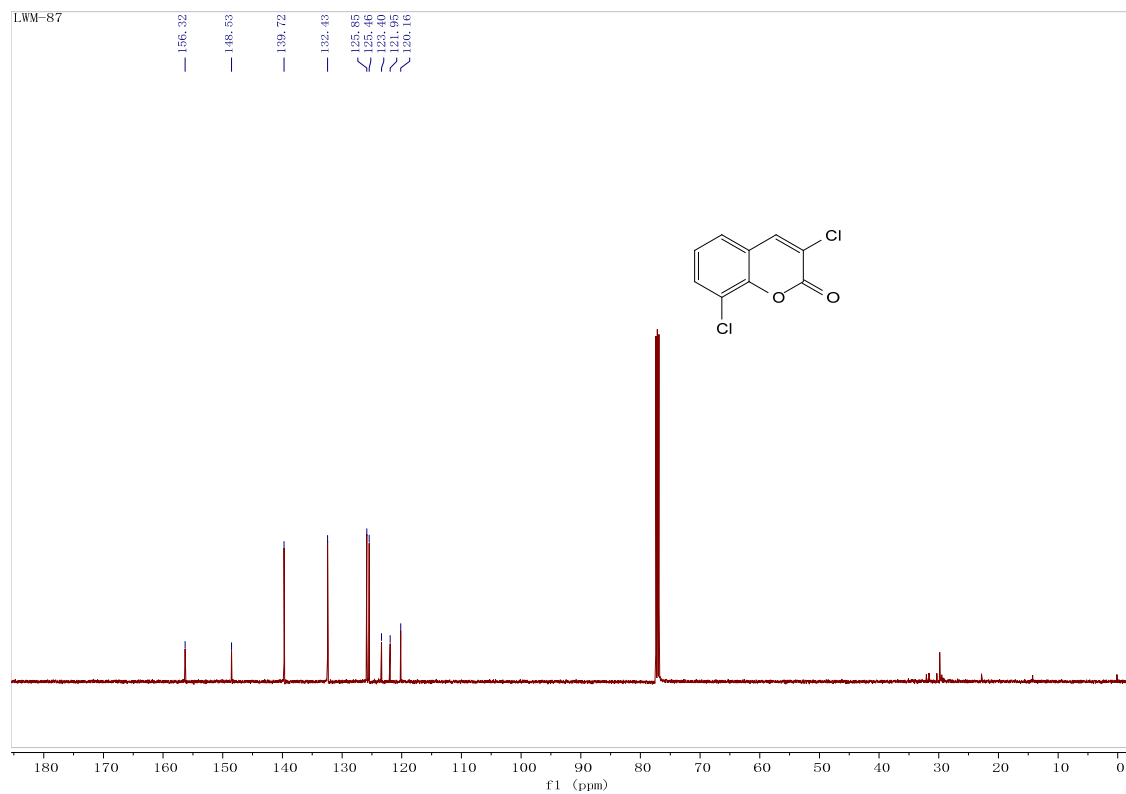



4g

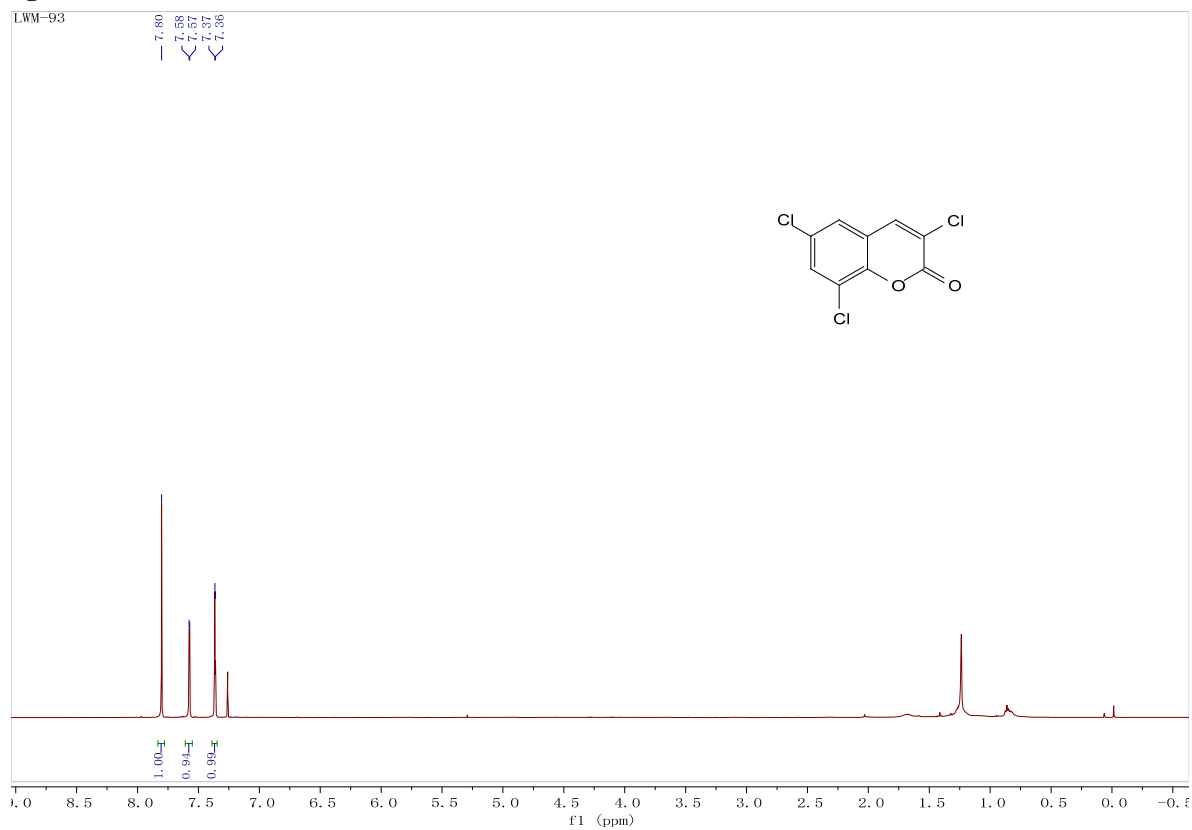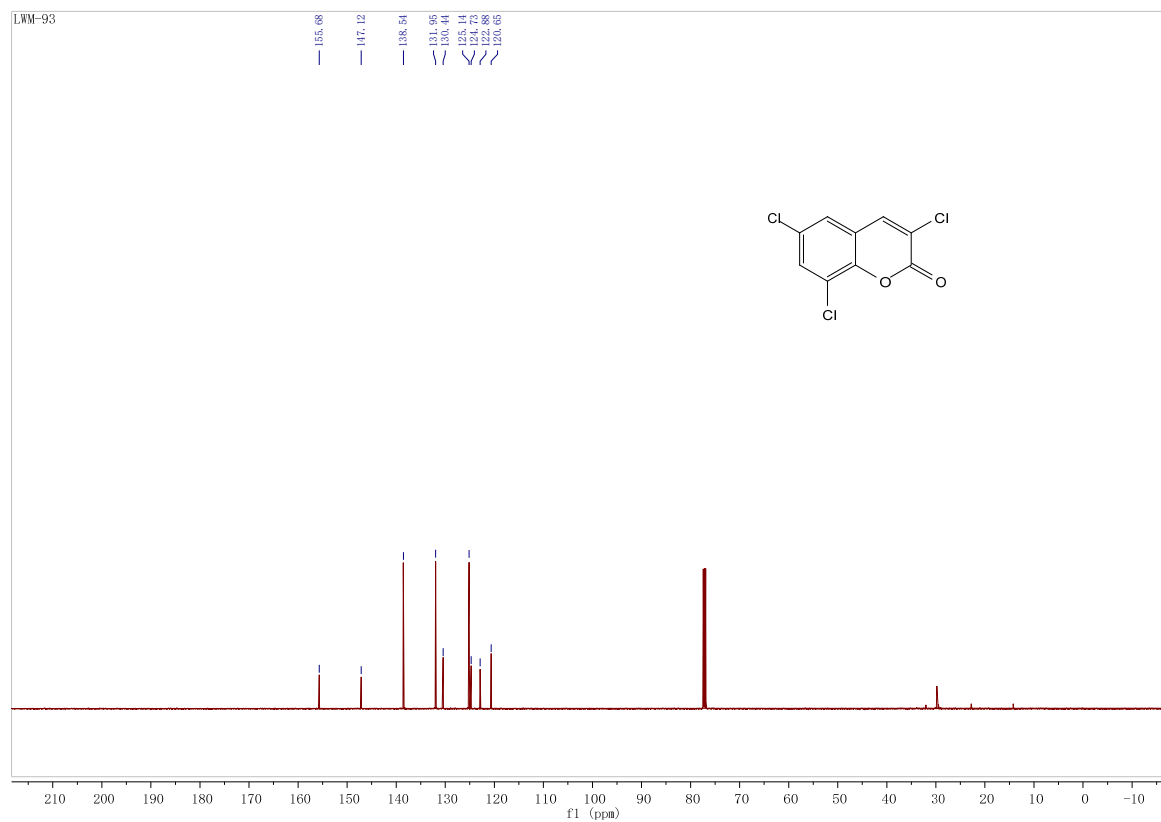

4h

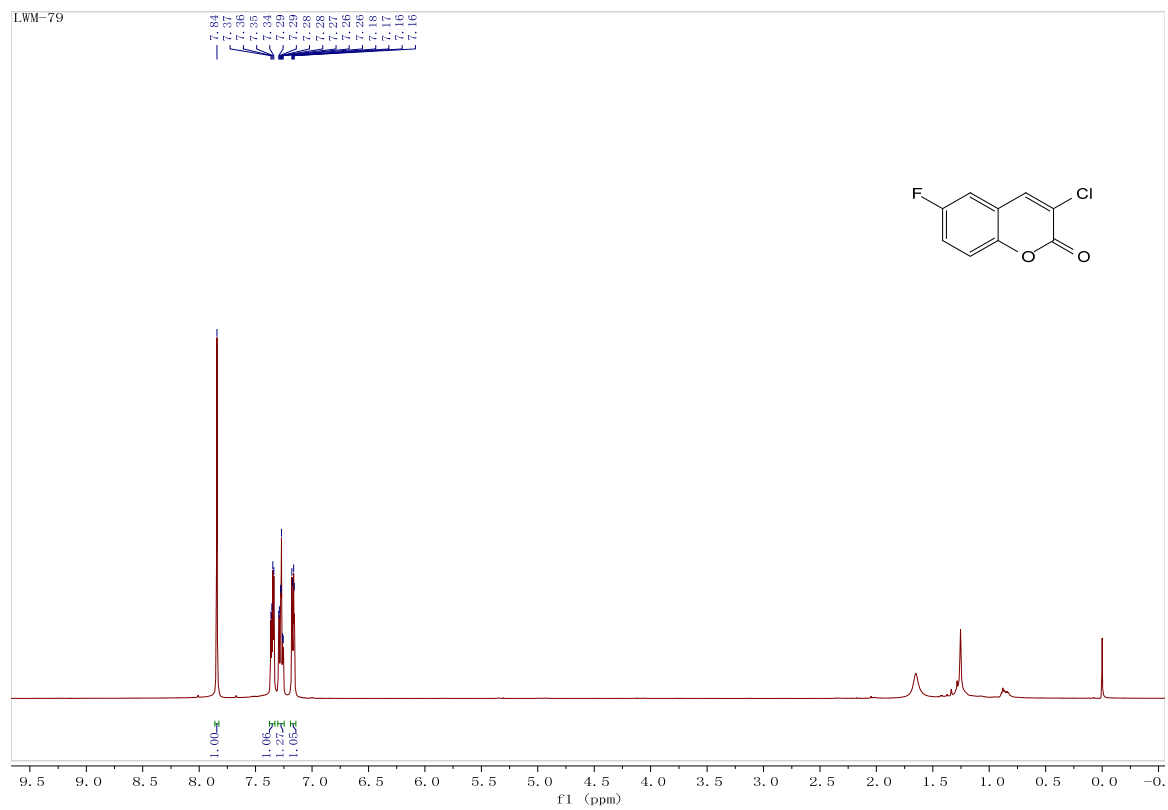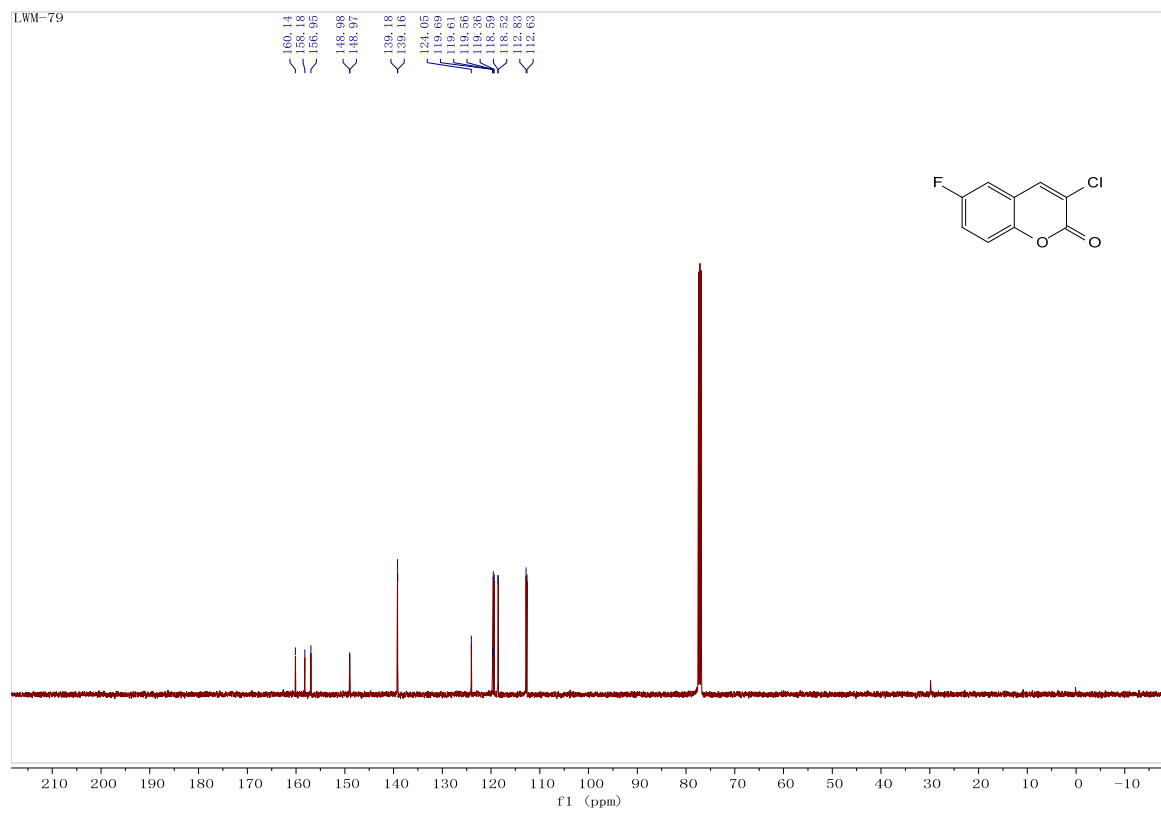

LWM-79

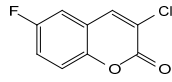

-116.79

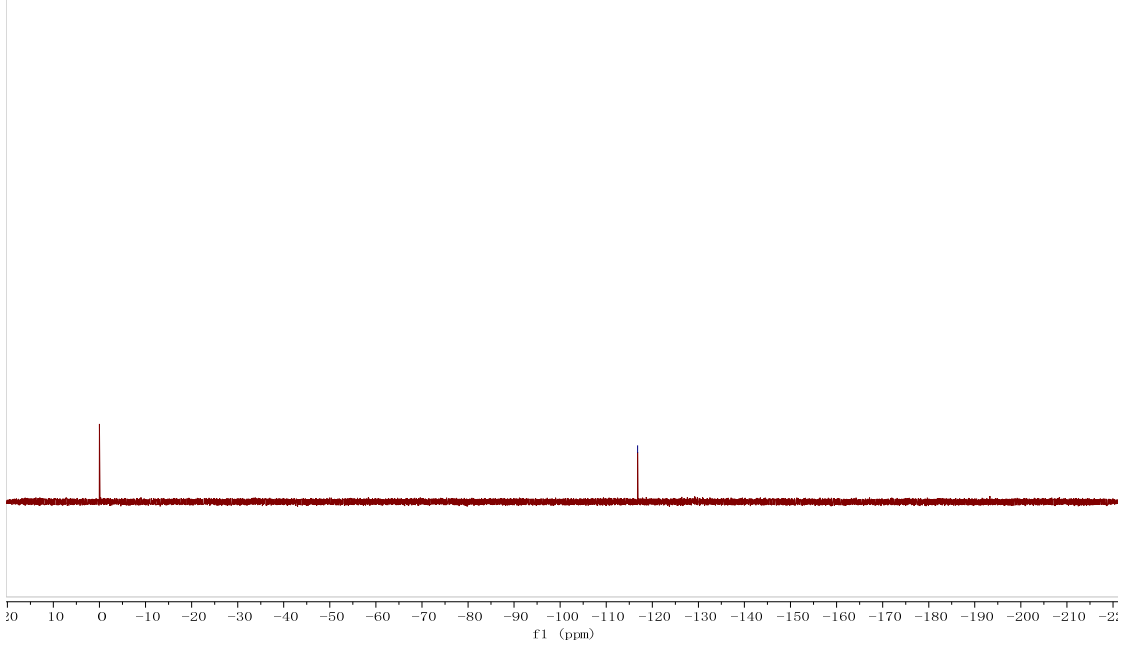

4i

ZM-LWM-809

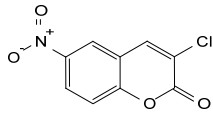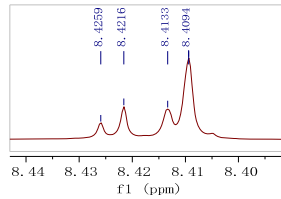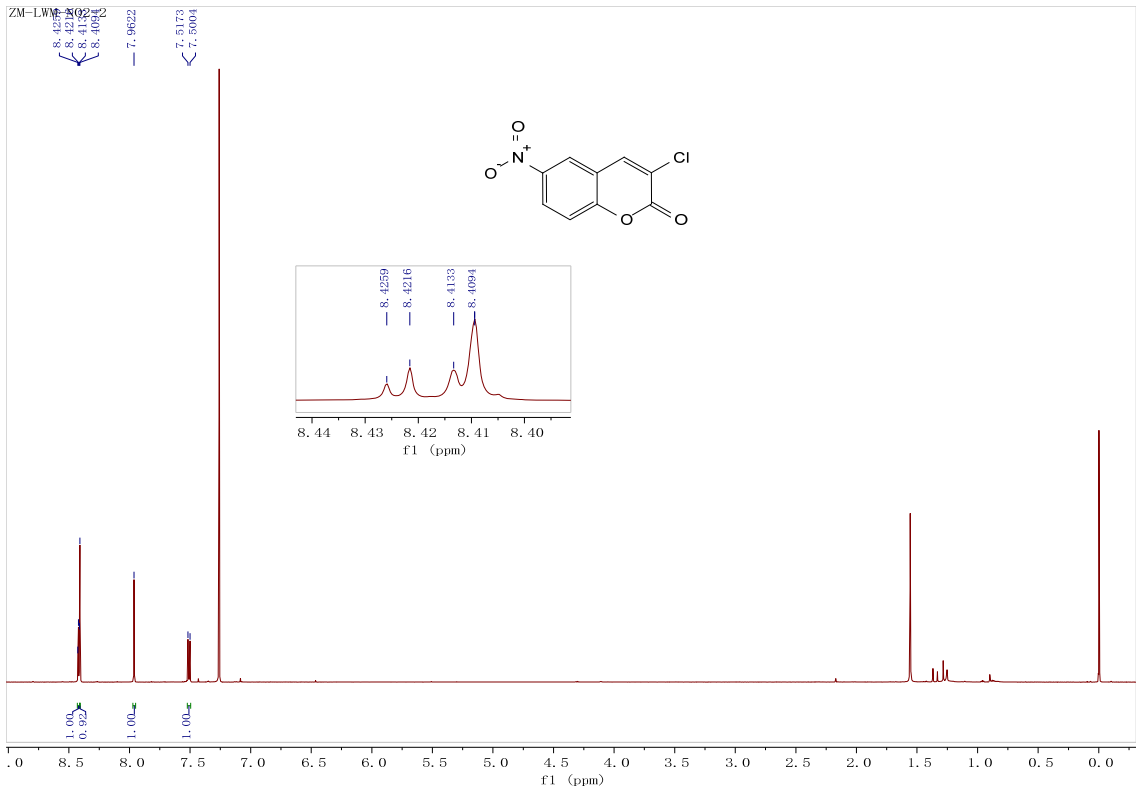

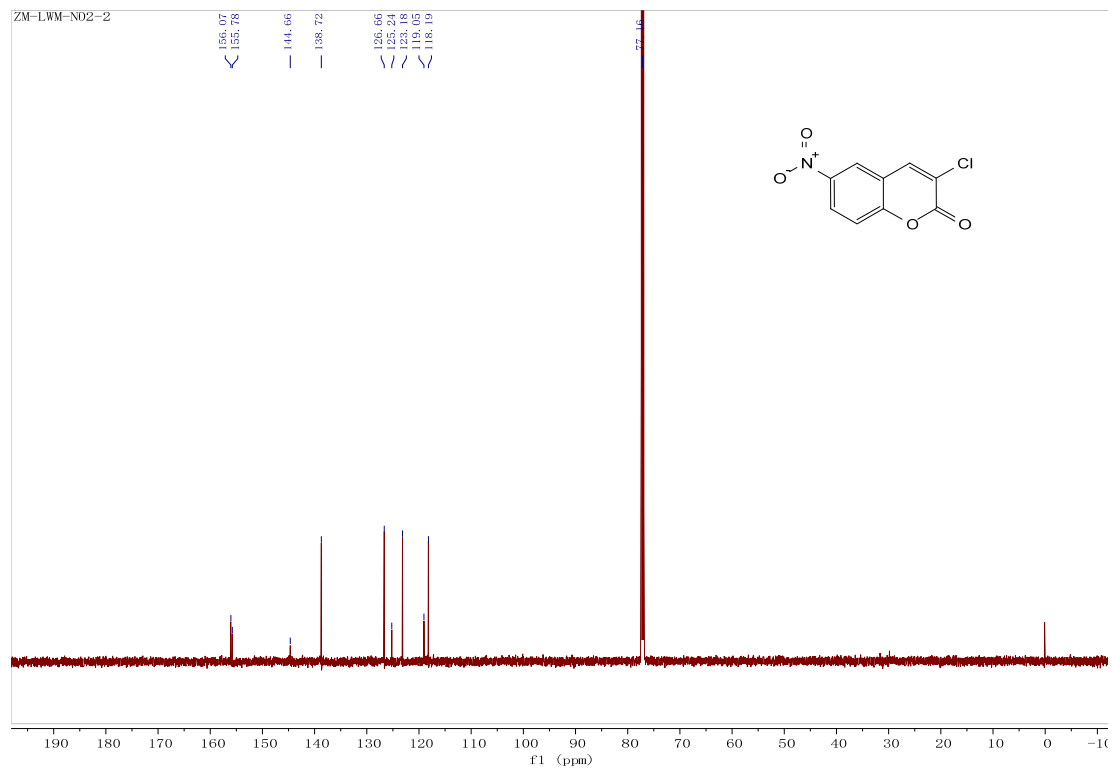

41

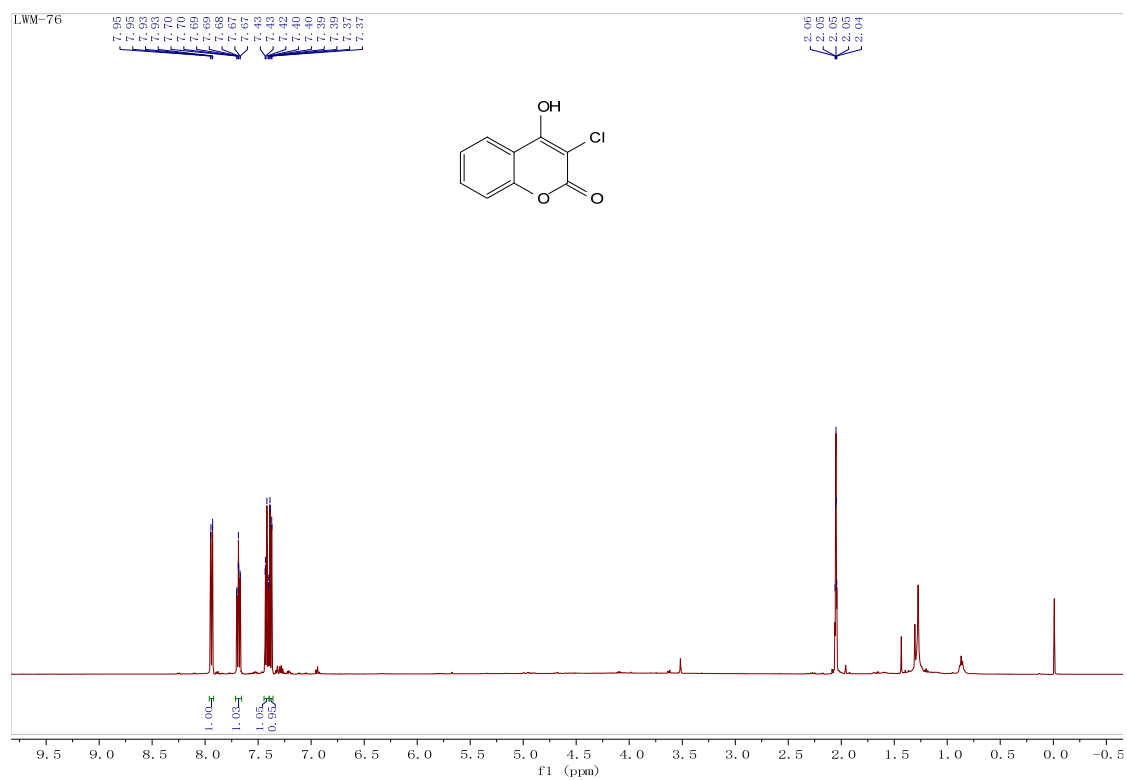



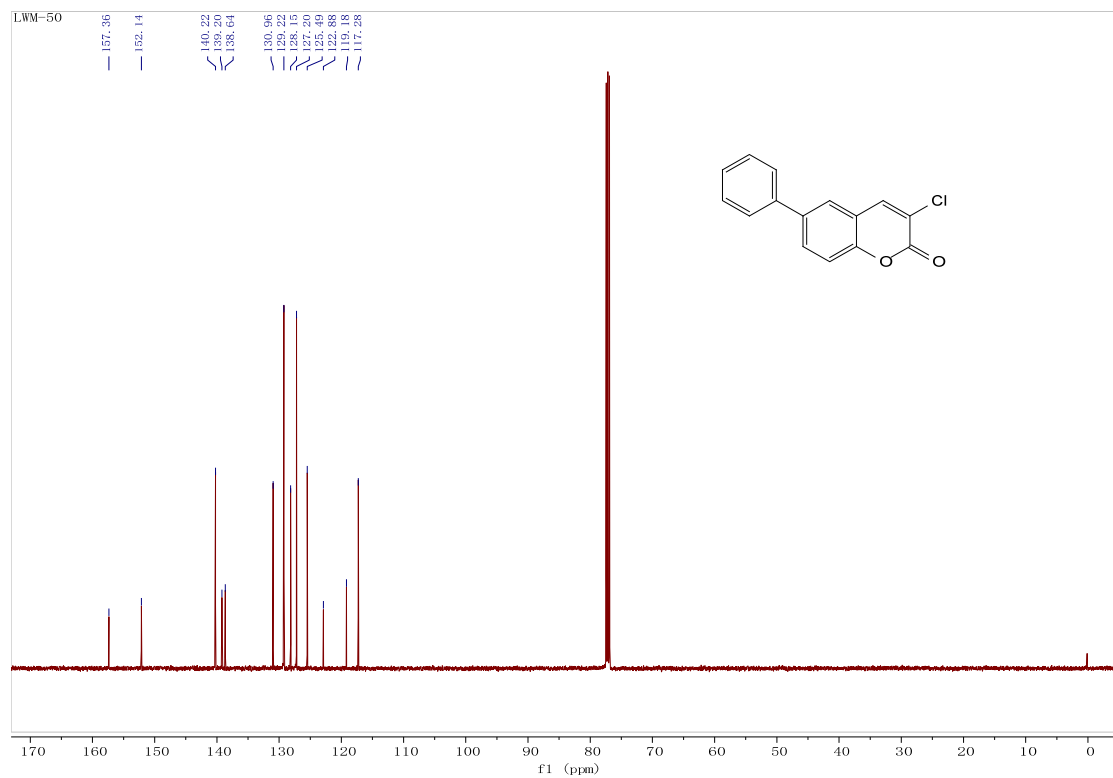

#### 4r

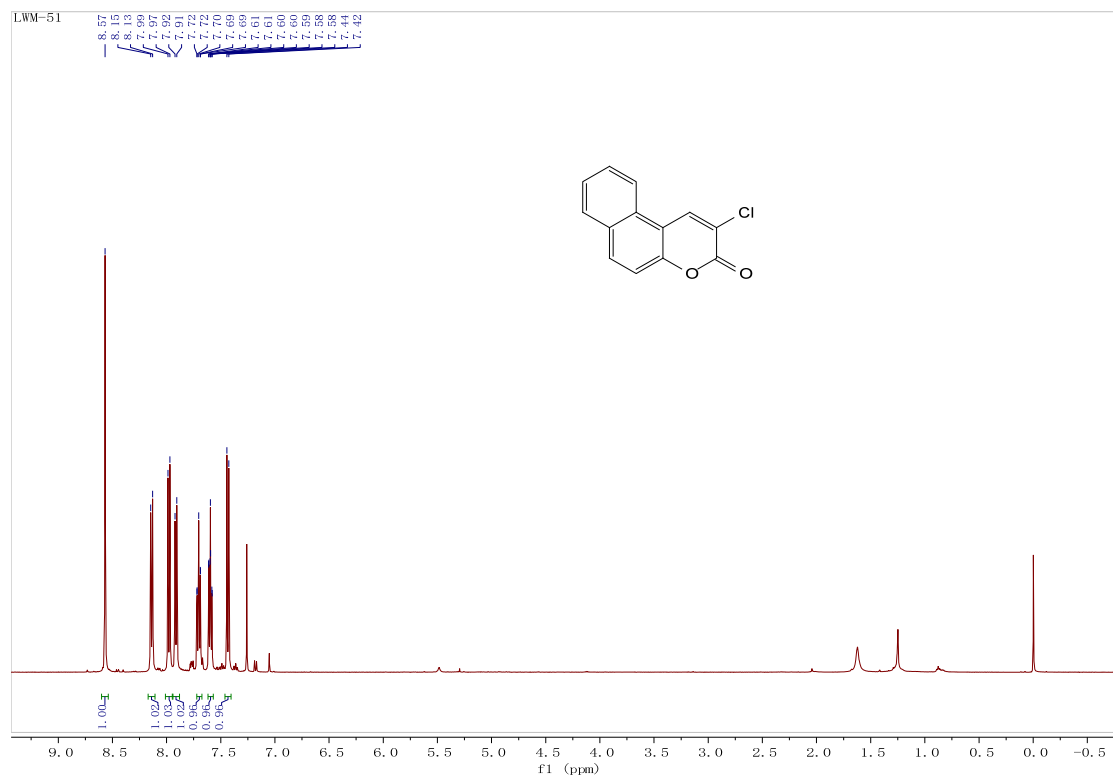

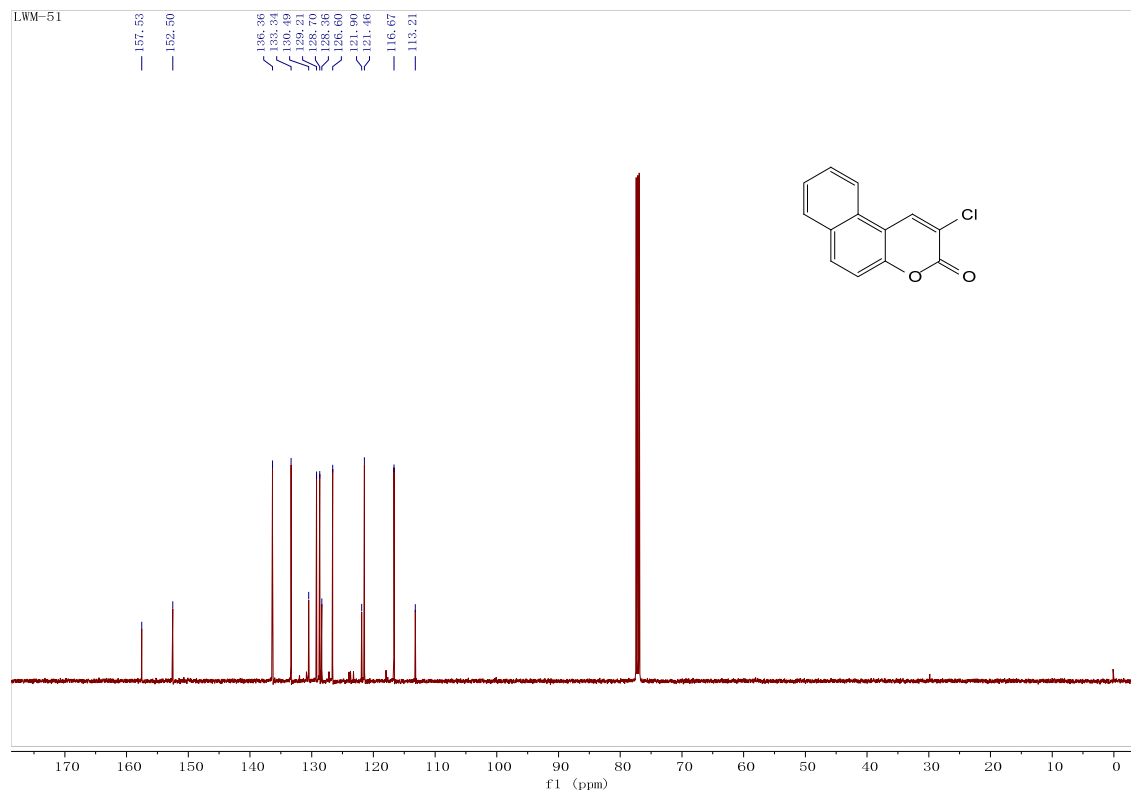

4s

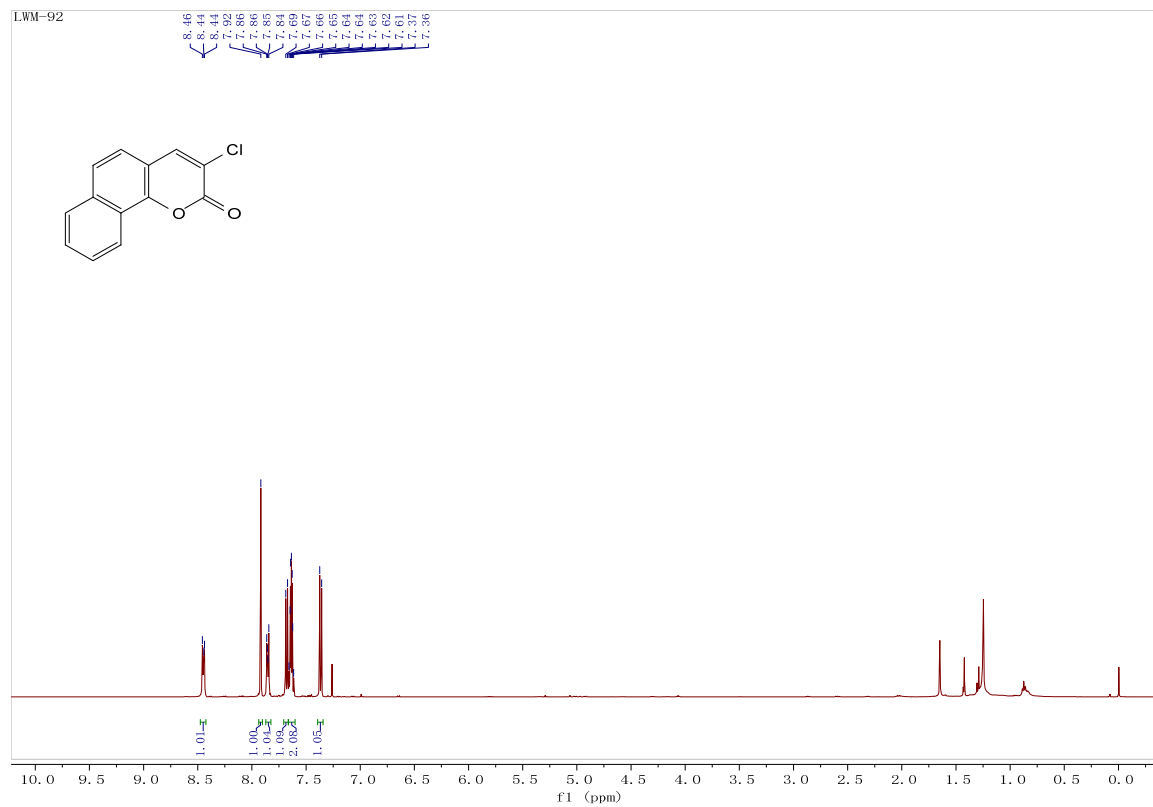

LWM-81

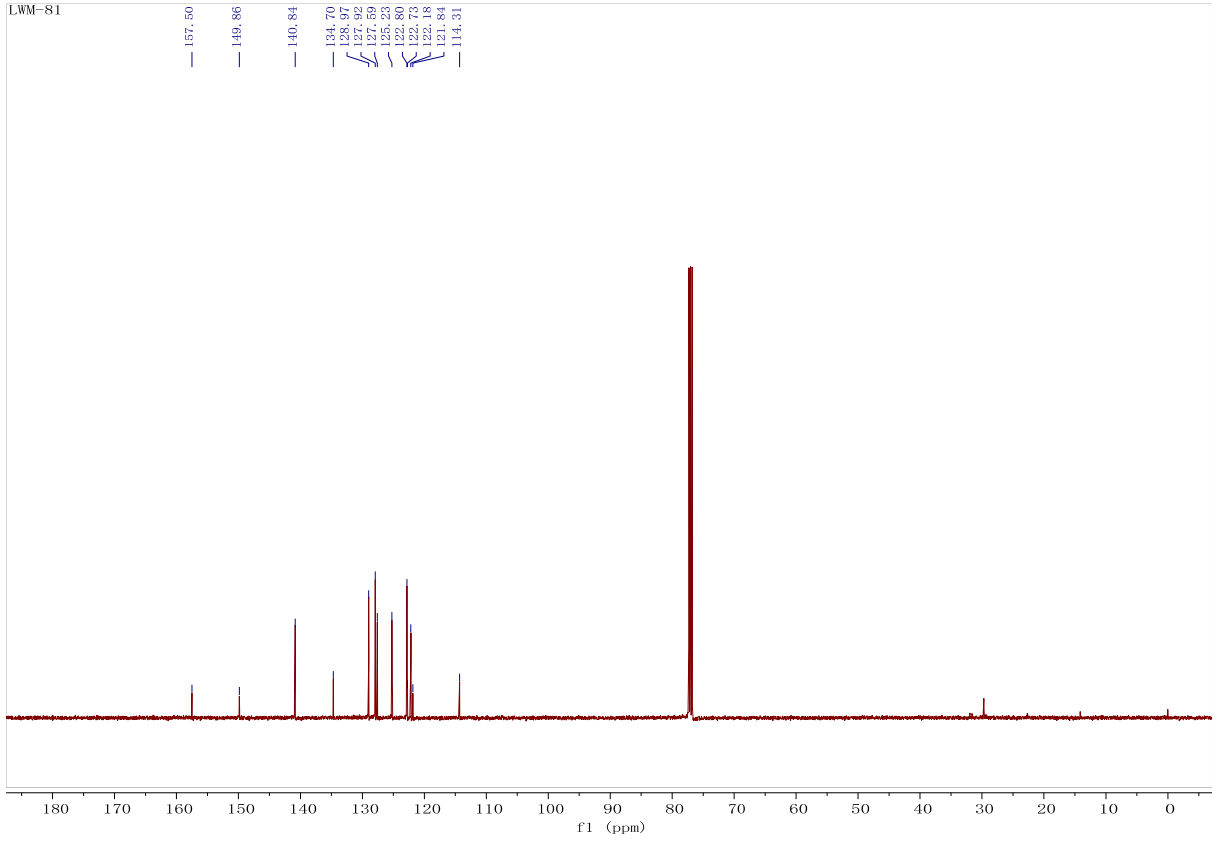



## 7. References

1. H. Choi, J. Kim and K. Lee, *Tetrahedron Letters*, 2016, **57**, 3600-3603.
2. M. L. N. Rao and A. Kumar, *Tetrahedron*, 2014, **70**, 6995-7005.
3. Y. Bai, J. Du and X. Weng, *Spectrochim Acta A Mol Biomol Spectrosc*, 2014, **126**, 14-20.
4. L. Zhao, J. Zhang, T. Liu, H. Mou, C. Wei, D. Hu and B. Song, *Journal of Agricultural and Food Chemistry*, 2020, **68**, 975-981.
5. X.-H. Cao, X. Pan, P.-J. Zhou, J.-P. Zou and O. T. Asekun, *Chemical Communications*, 2014, **50**, 3359-3362.
6. G. Pan, L. Zhao, N. Xiao, K. Yang, Y. Ma, X. Zhao, Z. Fan, Y. Zhang, Q. Yao, K. Lu and P. Yu, *European Journal of Medicinal Chemistry*, 2016, **122**, 674-683.
7. L. Vanammoole, R. Kommera, S. Hariprasad Kurma, J. Rao Vaidya and C. Raju Bhimapaka, *Chemistry Select*, 2020, **5**, 8875-8880.
8. F. Arndt, L. Loewe, R. Ün and E. Ayça, *Chemische Berichte*, 1951, **84**, 319-329.
9. R. S. Mali and J. V. Deshpande, *Organic Preparations and Procedures International*, 1995, **27**, 663-667.
